# Supplementary material for: Identification and Profiling of a Novel Bombyx mori latent virus Variant Acutely Infecting Helicoverpa armigera and Trichoplusia ni
Source: MDPI journal article supplement (doi:10.3390/v15051183), 2023-05-17
Supplement: s1 [file s1]

## Supplementary data:

**Supplementary Table S1 – Virus species and sequences identifiers used for phylogenetic tree construction**

| <b>Virus</b>                         | <b>Abbreviation</b> | <b>Genus:</b>      | <b>Reference</b> |
|--------------------------------------|---------------------|--------------------|------------------|
| Bombyx mori latent virus             | BmLV                | <i>Maculavirus</i> | AB624361.1       |
| Bombyx mori latent virus             | BmLV                | <i>Maculavirus</i> | AB186123.1       |
| Bombyx mori latent virus             | BmLV                | <i>Maculavirus</i> | KJ433990.1       |
| grapevine fleck virus                | GFkV                | <i>Maculavirus</i> | NP_542612.1      |
| grapevine red globe virus            | GRGV                | <i>Maculavirus</i> | YP_009268923.1   |
| bee macula-like virus 2              | BeeMLV2             | <i>Maculavirus</i> | YP_009551952.1   |
| turnip yellow mosaic virus           | TYMV                | <i>Tymovirus</i>   | NP_663297.1      |
| eggplant mosaic virus                | EMV                 | <i>Tymovirus</i>   | NP_040968.1      |
| anagryis vein yellowing virus        | AVYV                | <i>Tymovirus</i>   | YP_002308578.1   |
| oat blue dwarf virus                 | OBDV                | <i>Marafivirus</i> | NP_044447.1      |
| maize rayado fino virus              | MRFV                | <i>Marafivirus</i> | NP_115454.2      |
| citrus sudden death-associated virus | CSDaV               | <i>Marafivirus</i> | YP_224218.1      |
| potato virus x                       | PVX                 | <i>Potexvirus</i>  | YP_002332929.1   |

**Supplementary Table S2 – Composition of *Helicoverpa* artificial diet**

| <b>Component:</b>      | <b>Weight (g):</b> | <b>Brand:</b>  |
|------------------------|--------------------|----------------|
| Wheat Germ             | 72                 | Merck          |
| Casein                 | 33                 | Merck          |
| Sugar                  | 29.3               | Generic        |
| Brewer's Yeast         | 14.3               | Generic        |
| Wesson's salt          | 9.4                | MP Biomedicals |
| Sorbic acid            | 1.5                | Merck          |
| 4-hydroxybenzoic acid  | 0.93               | Merck          |
| linseed oil            | 1.87               | MP Biomedicals |
| Bactoagar              | 18.8               | BD             |
| Vanderzant vitamin mix | 1.0                | Merck          |
| Streptomycin sulphate  | 1.1                | Merck          |
| L-ascorbic acid        | 4.4                | Merck          |
| Methyl Paraben         | 2                  | Merck          |
| cholesterol            | 0.5                | Merck          |
| water                  | To 1 liter         |                |

Supplementary Table S3 – List of PCR primers

| Purpose | Species                                   | Gene<br>(GenBank or RefSeq)                                       | Strand  | Sequence                 | Reference |
|---------|-------------------------------------------|-------------------------------------------------------------------|---------|--------------------------|-----------|
| qPCR    | <i>Bombyx mori</i><br><i>latent virus</i> | <i>coat protein</i><br>(de novo)                                  | Forward | TTGACCTTTGTTGGACTACTGCTG | 1         |
|         |                                           |                                                                   | Reverse | GTGGTTGGTGTATGGAATCGG    |           |
|         |                                           | <i>replicase</i><br>(de novo)                                     | Forward | CGTCCCTCCCAACTGTTTGT     |           |
|         |                                           |                                                                   | Reverse | CTCCATTTTCTTCCGTTCCA     |           |
|         | <i>Trichoplusia ni</i>                    | <i>ribosomal protein S18</i><br>(XM_026882096.1)                  | Forward | GCTCTGTATCGCCGTAACCA     | 2         |
|         |                                           |                                                                   | Reverse | TGCCGTTTCGAACACAAGAC     |           |
|         |                                           | <i><math>\alpha</math>-tubulin</i><br>(XM_026877842.1)            | Forward | TTACCGAGTTCCAGACCAAC     |           |
|         |                                           |                                                                   | Reverse | AAGCAGGCGTTGGTGATCTC     |           |
|         |                                           | <i>18S</i><br>(KY514086)                                          | Forward | TGAGAAACGGCTACCACATCC    | 3         |
|         |                                           |                                                                   | Reverse | GATTACGAGGCCTCGTAAGAG    |           |
|         |                                           | <i>argonaute-2</i><br>(XM_026877347.1)                            | Forward | GACTGCGCGTCGTATAAACC     | 4         |
|         |                                           |                                                                   | Reverse | TGACATTGCCGTCCCTCAAA     |           |
|         |                                           | <i>siwi</i><br>(XM_026876665.1)                                   | Forward | CGGCTCCAATGGTTGACCTA     | 2         |
|         |                                           |                                                                   | Reverse | TGTTAGCAGCCAGGAATGCA     |           |
|         |                                           | <i>dicer-2</i><br>(XM_026878152.1)                                | Forward | CGGTGACTTGCAGACTGTCT     | 4         |
|         |                                           |                                                                   | Reverse | TTCCTGGCTGTTGCGGTAT      |           |
|         | <i>Helicoverpa armigera</i>               | <i>elongation factor 1<math>\alpha</math></i><br>(XM_021329970.2) | Forward | GAAGTCAAGTCCGTGGAGATG    | 5         |
|         |                                           |                                                                   | Reverse | GACCTGTGCTGTGAAGTCG      |           |
|         |                                           | <i>ribosomal protein L27</i><br>(XM_021344525.2)                  | Forward | ACAGGTATCCCCGCAAAGTGC    | 5         |
|         |                                           |                                                                   | Reverse | GTCCTTGGCGCTGAAGTTCTC    |           |
|         |                                           | <i><math>\alpha</math>-tubulin</i><br>(XM_021329536.2)            | Forward | CGCCCTCAACGTCGATCTAA     |           |
|         |                                           |                                                                   | Reverse | CCAGAGGGAAGTGGATACGC     |           |

|                      |                                                            |                                                                                    |                |                          |   |
|----------------------|------------------------------------------------------------|------------------------------------------------------------------------------------|----------------|--------------------------|---|
|                      |                                                            | <i>argonaute-2</i><br>(XM_049840284.1)                                             | <b>Forward</b> | CGCTCTGCCGAGGAAGATAT     |   |
|                      |                                                            |                                                                                    | <b>Reverse</b> | CACCTGAGCGAACTGTCCTT     |   |
|                      |                                                            | <i>siwi</i><br>(XM_049840316.1)                                                    | <b>Forward</b> | GATCGTGCTGTGCCTACTCA     |   |
|                      |                                                            |                                                                                    | <b>Reverse</b> | AGGTATTTCCACTCGCCACG     |   |
|                      |                                                            | <i>dicer-2</i><br>(XM_049847753.1)                                                 | <b>Forward</b> | GTCGTTGATCACCCAATGCG     | 6 |
|                      |                                                            |                                                                                    | <b>Reverse</b> | TTTTCCTTCGGGCAGACCTC     |   |
| Interspecies<br>qPCR | <i>Helicoverpa armigera</i><br>&<br><i>Trichoplusia ni</i> | <i>elongation factor 1a</i><br>(XM_021329970.2 and<br>XM_026883053.1)              | <b>Forward</b> | TCAACCACCCCGGTCAAATC     |   |
|                      |                                                            |                                                                                    | <b>Reverse</b> | TGATTTCTGGCGAACTTGCAG    |   |
|                      |                                                            | <i>heat shock protein 90</i><br>(XM_021341131.2 and<br>XM_026875446.1)             | <b>Forward</b> | ATCCCGCATGAAGGAGAACC     |   |
|                      |                                                            |                                                                                    | <b>Reverse</b> | CTCATCAATGGGCTCGGTCA     |   |
|                      |                                                            | <i>glyceraldehyde-3-phosphate dehydrogenase</i><br>(JF417983.1 and XM_026892236.1) | <b>Forward</b> | GTACGACAACGAGTTCGGCT     |   |
|                      |                                                            |                                                                                    | <b>Reverse</b> | TGGTCTGGATGTACTTGATGAGA  |   |
| Cloning              | <i>Trichoplusia ni</i>                                     | <i>argonaute-2</i><br>(XM_026877347.1)                                             | <b>Forward</b> | TCAAGGCTGGTCGTCAGTTC     |   |
|                      |                                                            |                                                                                    | <b>Reverse</b> | ATTGCCCTCTGAAACTCCG      |   |
|                      | <i>Bombyx mori latent virus</i>                            | Genome construct 1<br>(de novo)                                                    | <b>Forward</b> | CGATCAACAAAGTCAGCTTGTCC  |   |
|                      |                                                            |                                                                                    | <b>Reverse</b> | TTGGCGAGATTATCCCAGGC     |   |
|                      |                                                            | Genome construct 2<br>(de novo)                                                    | <b>Forward</b> | GCTGGTGTACTCTCTCGAAGG    |   |
|                      |                                                            |                                                                                    | <b>Reverse</b> | CTCAGGGTCGCAACATTGG      |   |
|                      |                                                            | Genome construct 3<br>(de novo)                                                    | <b>Forward</b> | CTTCCCCGATTCAAGCAACT     |   |
|                      |                                                            |                                                                                    | <b>Reverse</b> | TTTCCCAGGTTGAGACTCGC     |   |
|                      |                                                            | Genome construct 4<br>(de novo)                                                    | <b>Forward</b> | GTGCAGCTCATTACATTACTGG   |   |
|                      |                                                            |                                                                                    | <b>Reverse</b> | AGAGGTGTCATTAGCAGGTAGTGG |   |
|                      |                                                            | Genome construct 5<br>(de novo)                                                    | <b>Forward</b> | TACTCTCGTCGCCACAACCTC    |   |
|                      |                                                            |                                                                                    | <b>Reverse</b> | ACAGCAGTGTACCGCCAGTC     |   |

|  |            |                                           |                |                          |  |
|--|------------|-------------------------------------------|----------------|--------------------------|--|
|  |            | Genome construct 6<br>(de novo)           | <b>Forward</b> | ACCTCCAGTCTTCAGCCATCC    |  |
|  |            |                                           | <b>Reverse</b> | AGTGGTGATGTCGTA CTCTCGCT |  |
|  |            | Genome construct 7<br>(de novo)           | <b>Forward</b> | TCATGTCTGCAATGACTATACTGC |  |
|  |            |                                           | <b>Reverse</b> | TTGGCTAGACAGAACAAACGC    |  |
|  |            | Genome construct 8<br>(de novo)           | <b>Forward</b> | TTACAGCGAGTACGACATCACC   |  |
|  |            |                                           | <b>Reverse</b> | GCGAACTCCTTCTAGTACGGC    |  |
|  |            | Genome construct 9<br>(de novo)           | <b>Forward</b> | CATTCCGTCCTTGGTCAATGC    |  |
|  |            |                                           | <b>Reverse</b> | AGAGCGCGATGAACTAACAACC   |  |
|  | Colony PCR | <i>Trichoplusia ni</i>                    | <b>Forward</b> | GCTCAAGGTGGTAGCCAGTT     |  |
|  |            |                                           | <b>Reverse</b> | ACAAGCAGTTCAGATGCGGA     |  |
|  |            | <i>Bombyx mori</i><br><i>latent virus</i> | <b>Forward</b> | GTAAACGACGGCCAG          |  |
|  |            |                                           | <b>Reverse</b> | CAGGAAACAGCTATGAC        |  |

1. Innami K, Aizawa T, Tsukui T, et al. Infection studies of nontarget mammalian cell lines with Bombyx mori macula-like virus. *J Virol Methods*. 2016;229:24-26. doi:10.1016/j.jviromet.2015.12.002
2. Santos D, Verdonckt T-W, Mingels L, et al. PIWI Proteins Play an Antiviral Role in Lepidopteran Cell Lines. *Viruses*. 2022;14(7):1442. doi:10.3390/V14071442
3. Zhao Z, Wang L, Yue D, et al. Evaluation of reference genes for normalization of RT-qPCR gene expression data for trichoplusia ni cells during antheraea pernyi (Lepidoptera: Saturniidae) Multicapsid Nucleopolyhedrovirus (AnpeNPV) infection. *J Insect Sci*. 2019;19(1). doi:10.1093/jisesa/iey133
4. Santos D, Wynant N, Van den Brande S, et al. Insights into RNAi-based antiviral immunity in Lepidoptera: acute and persistent infections in Bombyx mori and Trichoplusia ni cell lines. *Sci Rep*. 2018;8(1):2423. doi:10.1038/s41598-018-20848-6
5. Zhang S, An S, Li Z, et al. Identification and validation of reference genes for normalization of gene expression analysis using qrt-pcr in helicoverpa armigera (lepidoptera: Noctuidae). *Gene*. 2015;555(2):393-402. doi:10.1016/j.gene.2014.11.038
6. Verdonckt T-W, Vanden Broeck J. Methods for the Cost-Effective Production of Bacteria-Derived Double-Stranded RNA for in vitro Knockdown Studies. *Front Physiol*. 2022;13. doi:10.3389/fphys.2022.836106

**Supplementary Table S4 – BioProjects from which SRA experiments were used for the identification of BmLV prevalence**

| <b>Species</b>       | <b>Tissue / cell line</b> | <b>Project</b> | <b>Viruses identified</b>        |
|----------------------|---------------------------|----------------|----------------------------------|
| <i>H. armigera</i>   | Whole body                | PRJNA261330    | HaSNPV, HaIV                     |
| “                    | Adult gonads              | PRJNA613606    | N/A                              |
| <i>B. mori</i>       | Whole body                | PRJNA339876    | BmNPV                            |
| “                    | “                         | PRJNA431156    | N/A                              |
| “                    | “                         | PRJNA119935    | BmIV                             |
| “                    | Eggs                      | PRJNA377550    | N/A                              |
| “                    | “                         | PRJNA336361    | N/A                              |
| “                    | Midgut                    | PRJEB7502      | BmCPV                            |
| “                    | Hemolymph                 | PRJNA209084    | BmIV                             |
| “                    | Silk Gland                | PRJNA119935    | BmIV                             |
| “                    | Ovary                     | PRJDB5508      | N/A                              |
| “                    | <i>Bm</i> N4              | PRJDB2257      | <b>BmLV</b> , SfR                |
| “                    | “                         | PRJDB4053      | <b>BmLV</b>                      |
| “                    | “                         | PRJDB5376      | <b>BmLV</b> , BmIV               |
| “                    | “                         | PRJDB2929      | <b>BmLV</b> , SfR                |
| “                    | “                         | PRJNA383127    | <b>BmLV</b> , SfR                |
| “                    | “                         | PRJNA419912    | <b>BmLV</b> , BmIV, SfRV, OpMNPV |
| “                    | “                         | PRJNA251635    | <b>BmLV</b> , SfRV, BmIV         |
| “                    | “                         | PRJNA251557    | <b>BmLV</b>                      |
| “                    | “                         | PRJNA239665    | <b>BmLV</b>                      |
| “                    | “                         | PRJNA284571    | <b>BmLV</b> , SfRV               |
| “                    | “                         | PRJNA632342    | <b>BmLV</b> , TnTED              |
| “                    | “                         | PRJDB5927      | <b>BmLV</b> , SfRV, BmIV         |
| “                    | “                         | PRJDB5142      | <b>BmLV</b> , SfRV               |
| “                    | “                         | PRJDB10429     | <b>BmLV</b> , SfRV, BmIV         |
| “                    | <i>Bm</i> -VF             | PRJDB5144      | <b>BmLV</b> , BmIV               |
| <i>S. frugiperda</i> | Gonads + soma             | PRJNA386859    | TnTED                            |
| “                    | Whole body                | PRJNA432886    | OsEV, SeIV, SfRV                 |
| “                    | <i>Sf</i> -9              | PRJNA523298    | AcMNPV, PnPV, SfRV               |
| <i>H. melpomene</i>  | Whole body                | PRJNA386859    | HeIV                             |
| <i>P. xylostella</i> | Gonads                    | PRJNA386859    | N/A                              |

|                      |               |             |                   |
|----------------------|---------------|-------------|-------------------|
| “                    | “             | PRJNA421581 | N/A               |
| <i>T. ni</i>         | Hi5 cells     | PRJNA336361 | FHV, BBV          |
| “                    | “             | PRJNA789788 | <b>BmLV</b> , FHV |
| “                    | Gonads + soma | PRJNA336361 | TnTED             |
| <i>O. furnacalis</i> | “             | PRJNA438858 | N/A               |
| <i>G. mellonella</i> | “             | PRJNA510393 | N/A               |
| <i>P. Xuthus</i>     | “             | PRJNA445942 | CTV               |

| Abbreviation | Virus name                                            |
|--------------|-------------------------------------------------------|
| AcMNPV       | Autographa californica multiple nucleopolyhedrovirus  |
| BBV          | Black Beetle Virus                                    |
| BmCPV        | Bombyx mori cytoplasmic polyhedrosis virus            |
| BmIV         | Bombyx mori iflavirus                                 |
| BmNPV        | Bombyx mori nucleopolyhedrovirus                      |
| CTV          | citrus tristeza virus                                 |
| FHV          | Flock House Virus                                     |
| GRLDaV       | Grapevine roditis leaf discoloration-associated virus |
| HaIV         | Helicoverpa armigera iflavirus                        |
| HaSNPV       | Helicoverpa armigera single nucleopolyhedrovirus      |
| HeIV         | Heliconius erato iflavirus                            |
| OpMNPV       | Orgyia pseudotsugata multiple nucleopolyhedrovirus    |
| OsEV         | Oryza sativa endornavirus                             |
| PnPV         | Perida nuda picorna-like virus                        |
| SeIV         | Spodoptera exigua iflavirus                           |
| SfRV         | Spodoptera frugiperda Rhabdovirus                     |
| TaBV         | Taro bacilliform virus                                |
| TnTED        | Trichoplusia ni Transposable Element D virus          |
| WSSV         | White Spot Syndrome Virus                             |

**Supplementary Table S5 - Accession number and origin of SRA and TSA archives used for genome assembly. RPM values indicate the prevalence of BmLV derived reads per million total reads.**

| Project:              | SRA:           | Lab/Institute                       | Country     | Year | Cells       | RPM  |
|-----------------------|----------------|-------------------------------------|-------------|------|-------------|------|
| <b>sRNA archives:</b> |                |                                     |             |      |             |      |
| PRJDB5144             | DRR068690      | GALS, U Tokyo                       | Japan       | 2018 | <i>BmVF</i> | 1328 |
| “                     | DRR068691      | “                                   | Japan       | 2018 | <i>BmVF</i> | 2829 |
| PRJDB10429            | DRR241076      | GALS, U Tokyo                       | Japan       | 2020 | <i>BmN4</i> | 2252 |
| PRJDB2257             | DRR006265      | Ins. Gen, U Tokyo                   | Japan       | 2014 | <i>BmN4</i> | 1796 |
| PRJDB4053             | DRR039989      | IMCB, U Tokyo                       | Japan       | 2016 | <i>BmN4</i> | 1083 |
| PRJDB5376             | DRR079253      | Ins. Gen, U Tokyo                   | Japan       | 2018 | <i>BmN4</i> | 1277 |
| PRJNA419912           | SRR6324419-24  | Siomi, U Tokyo                      | Japan       | 2017 | <i>BmN4</i> | 2295 |
| PRJNA632342           | SRR11781560+61 | Siomi, U Tokyo                      | Japan       | 2020 | <i>BmN4</i> | 5043 |
| PRJNA383127           | SRR5458683     | Comp Med Center, Thomas Jefferson U | USA         | 2017 | <i>BmN4</i> | 7430 |
| PRJDB2929             | DRR023337+40   | Biomed. C.S. Med. Cen.              | USA         | 2014 | <i>BmN4</i> | 6889 |
| PRJNA239665           | SRR1333837+38  | Mol. Bio., U Geneva                 | Switzerland | 2014 | <i>BmN4</i> | 7687 |
| PRJNA789788           | SRR17258733    | Mol. Dev. Phys., KU Leuven          | Belgium     | 2021 | <i>BmN4</i> | 5956 |
| “                     | SRR17258732    | Mol. Dev. Phys., KU Leuven          | Belgium     | 2021 | Hi5         | 574  |
| “                     | SRR24542361    | Mol. Dev. Phys., KU Leuven          | Belgium     | 2021 | Hi5         | 4529 |
| <b>TSA archives:</b>  |                |                                     |             |      |             |      |
| PRJDB3935             | DRR035925      | Ins. Gen, U Tokyo                   | Japan       | 2018 | <i>BmVF</i> |      |
| PRJNA554660           | SRR9685281     | IMB Mainz                           | Germany     | 2019 | <i>BmN4</i> |      |



Supplementary Table S6 – Sanger sequencing results

|                                                                                                                                                                                                                                                                                                                                                                                                                                                                                                                                                                                                                                                                                                                                                                                                                                                                                                                                                                                                                                                                                                                                                                                                                                                                                                                                                                                                                                                                                                                                                                                                                                                                                                                                                                                                                                                                                                                                                                                                                                                                                                                                                                                                                                                                                                                                                                                                                                                                                                                                                                                                                                                                                                                                                                                                                                                                                                                                                                                                                                                                                                                                                                                                                                                                                                                                                                                                                                                                                                                                                                                                                                                                                                                                                                                                                                                                                                                                                                                                                                                                                                                                                                                                                                                                                                                                                                                                                                                                                                                                                                                                                                                                                                                                                                                                                                                                                                                                                                                                                                                                                                                                                                                                                                                                                                                                                                                                                                                                                                                                                                                                                                                                                                                                                                                                                                                                                                                                                                                                                                                                                                                                                                                                                                                                                                                                                                                                                                                                                                                                                                                                                                                      |
|------------------------------------------------------------------------------------------------------------------------------------------------------------------------------------------------------------------------------------------------------------------------------------------------------------------------------------------------------------------------------------------------------------------------------------------------------------------------------------------------------------------------------------------------------------------------------------------------------------------------------------------------------------------------------------------------------------------------------------------------------------------------------------------------------------------------------------------------------------------------------------------------------------------------------------------------------------------------------------------------------------------------------------------------------------------------------------------------------------------------------------------------------------------------------------------------------------------------------------------------------------------------------------------------------------------------------------------------------------------------------------------------------------------------------------------------------------------------------------------------------------------------------------------------------------------------------------------------------------------------------------------------------------------------------------------------------------------------------------------------------------------------------------------------------------------------------------------------------------------------------------------------------------------------------------------------------------------------------------------------------------------------------------------------------------------------------------------------------------------------------------------------------------------------------------------------------------------------------------------------------------------------------------------------------------------------------------------------------------------------------------------------------------------------------------------------------------------------------------------------------------------------------------------------------------------------------------------------------------------------------------------------------------------------------------------------------------------------------------------------------------------------------------------------------------------------------------------------------------------------------------------------------------------------------------------------------------------------------------------------------------------------------------------------------------------------------------------------------------------------------------------------------------------------------------------------------------------------------------------------------------------------------------------------------------------------------------------------------------------------------------------------------------------------------------------------------------------------------------------------------------------------------------------------------------------------------------------------------------------------------------------------------------------------------------------------------------------------------------------------------------------------------------------------------------------------------------------------------------------------------------------------------------------------------------------------------------------------------------------------------------------------------------------------------------------------------------------------------------------------------------------------------------------------------------------------------------------------------------------------------------------------------------------------------------------------------------------------------------------------------------------------------------------------------------------------------------------------------------------------------------------------------------------------------------------------------------------------------------------------------------------------------------------------------------------------------------------------------------------------------------------------------------------------------------------------------------------------------------------------------------------------------------------------------------------------------------------------------------------------------------------------------------------------------------------------------------------------------------------------------------------------------------------------------------------------------------------------------------------------------------------------------------------------------------------------------------------------------------------------------------------------------------------------------------------------------------------------------------------------------------------------------------------------------------------------------------------------------------------------------------------------------------------------------------------------------------------------------------------------------------------------------------------------------------------------------------------------------------------------------------------------------------------------------------------------------------------------------------------------------------------------------------------------------------------------------------------------------------------------------------------------------------------------------------------------------------------------------------------------------------------------------------------------------------------------------------------------------------------------------------------------------------------------------------------------------------------------------------------------------------------------------------------------------------------------------------------------------------------------------------------------------|
| IOZCAS- <i>Ha-1 argonaute 2</i> - partial transcript                                                                                                                                                                                                                                                                                                                                                                                                                                                                                                                                                                                                                                                                                                                                                                                                                                                                                                                                                                                                                                                                                                                                                                                                                                                                                                                                                                                                                                                                                                                                                                                                                                                                                                                                                                                                                                                                                                                                                                                                                                                                                                                                                                                                                                                                                                                                                                                                                                                                                                                                                                                                                                                                                                                                                                                                                                                                                                                                                                                                                                                                                                                                                                                                                                                                                                                                                                                                                                                                                                                                                                                                                                                                                                                                                                                                                                                                                                                                                                                                                                                                                                                                                                                                                                                                                                                                                                                                                                                                                                                                                                                                                                                                                                                                                                                                                                                                                                                                                                                                                                                                                                                                                                                                                                                                                                                                                                                                                                                                                                                                                                                                                                                                                                                                                                                                                                                                                                                                                                                                                                                                                                                                                                                                                                                                                                                                                                                                                                                                                                                                                                                                 |
| CCCGTCGACCTGGGTTCTGGATATGAAATGTGGACGGGACTGTTTCAGTCTGCCATTTTACAAACAAATCGTTTATTAATATCGATGTGGCCACAAAGGTTTTCCTAAAGCTCAGAGTATGATTGATTGTCTTGTAAGAGACTTCAACTTGGACCCTTATCGTCCTA<br>TAGATAACCCAGAGGGGAGGAGACAAATTTGCAACATTTGTCAAGGGGCTCAAGGTGGTAGCCAGTTTAGTTGGTAAACACGGCGACGGCCGGACATAAACCGCGAGTTCGTATGTAACGGGTAGTTGGACCTCCGGACAAGCTCACATTCCTATCACTGAGTCGGA<br>TGGCCGCTCTCGCAAGCTCACTGTCGCTGAATACTTTGCCAAGGAAAGCAATATAGACTGAAATATCCGCATCTGAACCTGCTTGTGGGTGGGTCCCGTGAAAAGATGCATTACTTCCCAATGGAACCTCTCAATGTTTCCCTATGGACAGCCTTTAGCAAGACAACT<br>AAATGAAATGCAAGTCTCAAAAATGGTGAAGGAAGCGGCAACACCGCCTGATGAGCGTTTGGCTAAAAATTAAGAAGTTATTTCAAATATGCAGTACTCCAGAATAAAGATTTCGAAGCAGTTTGGACTGGAGATTTCGACAAATCTACACGGTCCAGGCCAAA<br>ATTTTAGATCCACCCGTTTGGAAAGTTGGAAATGCAAAAGTTACTCCAGGAAGGGCCAATGGCAGGCTAATCGCCTCTTGAAGGCGGAAGCACTCCAGTCATGGGGTCTCATCGCCGTCGATACAGACCCGAGAAATCGATTATGACAGCATGATTTCAGTGATTAT<br>CAGCACCCGGCAATCAGTTGGGCATGAATGTTTCCAAACCAAAGTTGCTTAATCTTGGCGCTAGAATGACGTCACTCCACGGCATTCTGATGAATGCTTACAAAGATGTGAGATTCTGTTTCGTGATCGTCTCTGCTAGGGGACGGGATGATTATCACAAGGTAAAGCA<br>AATGGCCGAACGTGAAGTTGGCATTCTGACACAATGCAATTCGAGAGATGACTGCGCGTCGTATAAACAGATGACAGCCAAGAACATCTTACTCAAGGTGAACCTCAAACTGATGGGTGTTAACCAAGCGATTGAACACAACACATTGCCAAAGTGTGTGAGGGAC<br>GGCAATGTCATGTCGCGCTGACGTCACTCATCCATCGCAAGTACGTACAGTCAAATGTTTCCAGTATTGACGCGGTAAACGGCTCCATCGATCCGCGATGCTATGATGATAACATTCGAACCTCAGCTCAGCGTGCAGACACCTAAGAAAGAGATGATTGTGGAGTTGCAAGA<br>TATGATGTTTCGATCACCTCAAGGTGTACAAGGATCGCAACAACCTCCCTGCCAAAGAAGA                                                                                                                                                                                                                                                                                                                                                                                                                                                                                                                                                                                                                                                                                                                                                                                                                                                                                                                                                                                                                                                                                                                                                                                                                                                                                                                                                                                                                                                                                                                                                                                                                                                                                                                                                                                                                                                                                                                                                                                                                                                                                                                                                                                                                                                                                                                                                                                                                                                                                                                                                                                                                                                                                                                                                                                                                                                                                                                                                                                                                                                                                                                                                                                                                                                                                                                                                                                                                                                                                                                                                                                                                                                                                                                                                                                                                                                                                                                                                                                                                                                                                                                                                                                                                                                                                                                                                                                                                                                                                                                                                                                                                                                                                                                                                                                                                                                                                                                                                                                                                                                                                                                                                           |
|                                                                                                                                                                                                                                                                                                                                                                                                                                                                                                                                                                                                                                                                                                                                                                                                                                                                                                                                                                                                                                                                                                                                                                                                                                                                                                                                                                                                                                                                                                                                                                                                                                                                                                                                                                                                                                                                                                                                                                                                                                                                                                                                                                                                                                                                                                                                                                                                                                                                                                                                                                                                                                                                                                                                                                                                                                                                                                                                                                                                                                                                                                                                                                                                                                                                                                                                                                                                                                                                                                                                                                                                                                                                                                                                                                                                                                                                                                                                                                                                                                                                                                                                                                                                                                                                                                                                                                                                                                                                                                                                                                                                                                                                                                                                                                                                                                                                                                                                                                                                                                                                                                                                                                                                                                                                                                                                                                                                                                                                                                                                                                                                                                                                                                                                                                                                                                                                                                                                                                                                                                                                                                                                                                                                                                                                                                                                                                                                                                                                                                                                                                                                                                                      |
| Bombyx mori latent virus (extracted from Hi5 cells)                                                                                                                                                                                                                                                                                                                                                                                                                                                                                                                                                                                                                                                                                                                                                                                                                                                                                                                                                                                                                                                                                                                                                                                                                                                                                                                                                                                                                                                                                                                                                                                                                                                                                                                                                                                                                                                                                                                                                                                                                                                                                                                                                                                                                                                                                                                                                                                                                                                                                                                                                                                                                                                                                                                                                                                                                                                                                                                                                                                                                                                                                                                                                                                                                                                                                                                                                                                                                                                                                                                                                                                                                                                                                                                                                                                                                                                                                                                                                                                                                                                                                                                                                                                                                                                                                                                                                                                                                                                                                                                                                                                                                                                                                                                                                                                                                                                                                                                                                                                                                                                                                                                                                                                                                                                                                                                                                                                                                                                                                                                                                                                                                                                                                                                                                                                                                                                                                                                                                                                                                                                                                                                                                                                                                                                                                                                                                                                                                                                                                                                                                                                                  |
| GAATGGCTTTCACCAATTTAGTCGACACTCTCGCCAACACCATCCACCGAGACGCCATAACGGCTCCTCTAGTGGAAACGGCCATCAGCAATTTCCGTCACAAGCTTCAACTTTACCCATATCAGGTAAATCCAAAGCTCATCCCAATTGCTCAATCAACTCGGAATAGGAGTCACTCCTATGGCACTTCACTCATCTCTA<br>TGCCGCTCATAAGGCCATAGAAACTTACCTCTGTTTGAACATTGGAATCATCTTGGCAGAGTCCCTTCTACGGTAATGTATATGAAACCTGAAAAATTTCAAAACTTCAGCAATTAACCCCAAACCTTTGCTTCCTCATTAACCTTCAGGCCACACCCAAAGGACATTACTCGGTACCCCGTTAGCAACCTCATCTGTGTC<br>GAAACTGAAGTAGCGTTTCATGCACGACGCTCTCATGTTTCATACACCCCTTCCCAAATTTTAGGCCCTTTTCAAGGACTCCCTTCCATGACCTCACTCTATTGTTCTCTTATAGTCCCTGCCGAAGCCGCTTATGGAAGTGCTTCACTTTCCTGATCTCTACAGCTATACAATTAAGATGATCAGCTGGTGTACTCTCTCGAA<br>GGAAATGCTACCGGCAATTACACTCAACCTCTCTGTTCTTTGGATTGGCTCCGCGCTCAGGTATTTCATAGGCGACCTTCATCTATCTGTCACTTTACTGGAATCCTTGTTTCCGTCATTCCATCTAATCACTCGAGTTCCTCAACCTCCCCCTCTCGCGGAACATGATTCTTAACCTCTCCAGCTTCCGTTCTCTA<br>ATCCAGAAGGATTGAACCTGCCGATCAAAATCAGACTCTGTGCCAATCGAAGTTTACAATTTCTTTGTTTACTTATGTTTCGAGCGGTTTCGACGCTTCCGGTCACTGATCTCTCCGGATTTCGTAGGAGCGCAACGTCAAAACCGAGAATTCATGGGTCAATCTCAGCTGGGTAATCTCAGCTGGGTAATCTCGAACTCATACCTTTAGATGGCTGCCCACTCAITTTGGACTTC<br>GTGCTCGGCCCGCCCTTCTTAGAGTATGGTTTCTGCTATAACTCATACAAGCTTTTATCACTCTGGATCGTGGTACATTTGCGTTTCGATATCAGTTATCACACTGGTTCCTTCTCACCATCCCAATTTCTCACCATCTTTCCCTTATCAGCTGTGTTATCGAACTCATACCTTTAGATGGCTGCCCACTCAITTTGGACTTC<br>ACAAACCTTGCCCTCTTTGATTACAGAGCCTTCGCTAGCACTTACGGCGCTACCTCACCAACTCACCAGAGTTCGCCACTTCAATCTTTTCTATTAATCATTTATTACAGCTTTTGGCAAGTCATTGCAAAAAATTTCTCACCATCTCTTAGTCATTGCAACCAATCTGCTGCTTCCAGCAAAATCTGCTCTCTCATTTGCTGTGTCTCCACTTCT<br>ACAACGAAGGTGGCTCTTGCTTGGTTTGTCTGCCCTCACTGGCATTGGGCCATTACCATCTCCGCGGTGGCAACTCACTCAAGAAAAAGTCCGATGCTTATCTCTCTTATTTCACCCGGATCCCTGGAGACTCACCAATTCGAACATCTAATGTGATGGCTATTCTCATTTCTTCCCGATTACAGCACTCGACTCC<br>TTCACCGTCTACACAACCGTCCCTGACCCCATGTTATCGAACAACCCCTGCTAACGTCTCAAAACGTCACTCGTTTCCAAACGAGCTACCTACACCGGCTCATCTCGAGACACCCCAAGCCCAAGTAAACAAGAGATAAAATCCGGTGAGACTCTTGCCACCGGCTTCCAAATGTTGCGACCTGAGCGGCC<br>TCGGAAGCCTCGAAACAGACGCGCCTCTACTCTTTAAGTTCCGATCCAAGTGTCTATGGGCCATCTCCCTCATAAAGAACTTTTGGCATTTTATCTCCGATCACGAGTGCAATGTTTAAATCGTAAGCACTCAATGTTTCAACGCTTCTTCCCGGATCAGCCTGTCTTGTGTTGCTTTTGCTCAAGCTCA<br>AATTTACCCCTCAGCAAGTATGGGCTCACTTTGCACCCCTTTCCCTGATTCCCTTCTCGATGGTCCCTTAGAACGCTCTCAAGGCTCAAGCTCAGAACACCTCGAAGCTCTCGCTGGAGTTTGAATATCACGTCTCTTATCGCCATGGCGAACATGTCAACACCATAGGCCCGGATGAGCAGCACCATGCTCCGCTTAT<br>TTACACTGGTGATGGATCATAGGTCAATGGGCTGCCGACGAATCCCTCTTCCCCCCCTTTCTCCTATTCAGAGCTTCGGCAAAACCCCTCAATTCATTGCTCAACAGCTATTCCGTTTAGAGACTCTCACGGCAATCTCCTACCAATTTCGACAAGTTTCAAGTACAAGCTCTGAAGCCAGGGCAAAAAATTTGG<br>CCTCAAAATGAAAAATGAGACTGATGGAGTTATACAATCTAGCTCCGAGCGGCATCATCAGACCCCACTTTTTCACAACGCTTGACCAAGAGCGGACTTCGCCCAACAAGTTTCGCTGCGAGCTATTTCACATTAATCTGAGTTTCTGGTTGTGGGAAAACTTCCCTGTCACTCAGCTCCTCAAAACCAAAGCATTTAA<br>AAGCCAGTACAGAGTCGCGCTCCCAACCCGAGTTGCGTACCGAATGGAAGACCACATGAAACTCCCTGTAGCGACGTTTGGCGAGTCTCAACCTGGGAAACCTCTCTCATGAAATCAGCACCCGCTTGGTTATCGACGAAGGTACAAAAATGGCTCGAGGTTTCTCGGATCTAGCTCTCTAGCTGATCCAGCCAT<br>CCAATTTGTCATCTCTCTCGGAGACCATGCCAAACCGTCTATTCTCCGTCAATCCGGACTCTTCAATATCTGTCTGATTCCGGAAGTCGAACATCTTAAACCGTATCTGATTTTACTGTCTCTGGACCCACCGACTTCCTCTCGCTAGCTGATTTCTGCGGCTTCGACTACGAACCCCTCAAGAAGGTTTATCGGA<br>CGTCGAGACATCCACAAAACTTATTCCCATATTAACATCAAGTCAGCAGACGGCGCGAGTCTGTGCCGATACAGGCCATCGAGCGTCACTTTTGTCTCTCAAGGTTCAACTTCCAGGCTCTGCCCCAAATCTCATCGACTCCAATGTGGCTCTGTCCACGTTTCTGCTACTCTGTCGCCACAACCTCGTTCCCG<br>TTCCTGGAGTCATTTTACGGGAAACCATCGAATGTTTCCAATCAAGACCTGGTACGGCGCACTCTTCGAGGCTATGCTCAATGACCAACCTTCAACTCTCTCAACATATTGCTAATGAACCTTGGAGGATGGAACCTATTACATCACCGATCAAGAAACGAAAGACCATCTCTGTTGGCGGGTCTTATGACTTTTCAGCT<br>TCCGAAAGCCACCAAAAAAGACATCACCGAATGACCAACTTTAAATTCGATCAGCTCATATCAGGGCTCTCGCCCTGCTATCTGCCAAACCACTACCTGCTAATGACACCTCTGACATAATAATTTTGCACCTGAACCTTTTGACCTCCAGTCTTCAGCCATCCCGAGACTTGACACTCATCATATCCAGAAACTCGTGC<br>TCCTCTCCATTTTGATATTTCTTCTCTCTCCCTACCAAAAGTGGACATTAGTAGTGTGAATCTACAGACACCCGCATAGAACTGTTTATCCCGGCTGCGACTACAAAACTGTGGCGAGCTTAATGATGGATCCCGGGGACCCGACTCCCTTGAATCCGGCAACAGGGGGAGTCTCCAATCAATTTCCATGGGTGCTGTC<br>TCCCTTATGAGAATGGCGCCCAAAACCTCAGCGTTATAGCACCCAAACATGACTCGAAAAATGACCCGACTTTACTTTGGGCTCCATAGCCAAAAAGACTCCGTTTTCGACCCTCTTCTCTCTTACAGACTTTCTCTCTGACGAAGTCTTGGCACATTTCTGTTTTCATCTCTATGTGCGAGCTATAAACGACATCCCA<br>ATCATAAAGTTCTCTTTAGCCCGACCTTTTCGTTGAATGTATCAATCTTAATGAGTACTCACAGCTTTTCAACAAGACTCAAGCTGTCAATCCAAAGCGCAACATCGTTCCGGATCCCGACTGGCGGTACACTGCTGTCCGATATTTTCAAAACCTCAGCATAAAAATCAACGAAGGCTCAATTTTCGGCCCTTGGAAAGC<br>ATGCCAGACATTAGCTCTGATGCAATGATGCCATTGTCTTAATTTTGGCCGATCAAGAAAAATCAGCGAATTTTCGACAGTAAGAATCGTCTCCCACTTGTTTTGGTATGGAAGGCCAAACTCAATACGATCTCTCGGGTTGCTCTGTCCTCACTGAAACCATACAAAATTCATGTCTGCAATGACTATATCGCTTTG<br>ACCAATCTCAGCATGGTGAGGCGTGTGTTTGGAAACGGAAGAAAAATGGAGCGGCTTTCATTTCCATCTCATCTTATAGACTTCCATTGCTACATCAAAACCAACATTAACAAGTCAATTTGGACCTCTGACCTGCTATGCGGCTCACCGCGAGCCGGGACATTATGACGACAAACACGGATTACAAATATGCGGCTCAATTACAG<br>CGAGTACGACATCAACCTCAACTGTCTTGTCTCAGGTGATGATCTTTAGTATACACCTCACTCTGCTCACCCGATTTGGGACGCGGTTTCTCCTCCTCTTCTCACACTTCAACATAAAGAGTTTGTGCAAAACGGGTCTCTCTGCGGCTATTTACTTGGGACGCGCCGGAGCAATTTAGCTGCTCCCTGCTTACTCGC<br>TAAACTTTGTGTAGCTTACGACGACGAAACCTTTCTGACAAAAATAGCGCTTACTCTCAGTGAGTTTGTGTAGGCCACTCTCTCGCGGACGCTTCTCGGACTCTCTGCGCAGATCAAGTAATTTTACAGAGCGGCTCTTTTGAATTTCTTTGCGGTGAAATTTTAAAGGAACAAAACTCGCCCTCAAAATAGGGGAAG<br>TGCCGAACATCTTTGTCAGAAAATGCTTTCCCTCGGTTTCTCTGGTTATCACACCCCTTATAGCTCTCTTGGATAGGACGCCCGCGCTACGTTTATAGCCCGCACTCGTTTGCAGCCCTCTTCTGATAGAGGTTTGTGCAACTAGATTTCGTATGACCTATTCATGGAAGAAATTTGCGCTTTAGTCG<br>CTTCTGGCGCTTGGGCATTTCCGCTTGTGCTATGCTTCTCTTCCAAACCCGCTCAACTGATCACCCGCTTCGCGGTCATAGGATATGCAACCTTTCGCTAGCTCTGACAGGTTGTCTGTGTCAGCAACCGCTCCGCGGCTCTCCCTGGGACGATCTCCCTGGGACGATCTCTCAACGTTTGTATCAT<br>CCCTTTTCAACGCTGTACTTCGATCTTACTGGCACGGAACCAAAATCGAACAGTGTCACTGTGCAATCACTACGAACGCTCTCCCTATCATCAAAAGGCTACCGGACGCGTATCTTGTCATCTTGAAGCTGTGCTTTTCCCTCCGCGCTAGCTCAAAATACCACTGACAGTGTGACTGTGCTGAGC<br>TCACAGTTGAAGGAGTCAATGTGTGGGCAACCTTCACTCCGCTCGCTATTACTTTGGCGCTCGCCCTTCACTCCGATCCCTCGGATCTCGGTCAGACCCGATCACTCAACCCGATCACTCAACCAACCCAGACTTAACATCAATTTCCATATCCCTGACGCGGTACGAGAAGGTT<br>CGCGCGGGGTTAAAGCTCCGTTGTGTCATCAGAGGCTCATCAGCGTATCTCACCCCTCGCTCACTGGGATGGCTGAAGGGGTTTCTCTCCCTTATTTTCAAGTGAATGATGTATCAACAAGCTTCGCGCTTATTAGTGCGTATCTCCAGCATCTCCAGCATCTTCGCTCCCTCTCTCAACTCACCCCTCATTTGAAGAGCTGTTATGG<br>CCACAAACCAAGCATCTACGACTATAAAGTCAAAATCGCGGATAATGATTAGTAACTCAATGAACCTGCGGACGCTGATCTTCTGATCTTCTTAACTCTCCCTCGATACCCGATTTGATGACACAACATCATGACGGTTCGTAAGAACACAAAACTGCT<br>TCTTCTCTGCTCATCTATTCAAGCTTCTCTCCCTTCTCCGAGATCTACCGCAGTTGATAGATCTCGCCATGTTTCTTCGACTCTTGGAGTTTACGTAAAAATCTTAATCCCTTATCTTCCAGATTGGGTTGTTAGTTTCAATCCGCTCT |

**Supplementary Table S7 – Amino acid difference matrix of the replicase polyprotein between newly assembled and reference BmLV genomes. Cells are shaded from high (dark) to low (light) percentage difference. The reference BmLV genome and the genome of the BmLV variant employed in this research are written in bold.**

| % Different AAs                 | DRR068691 | SRR6324419-24 | SRR11781560-1 | SRR24542361 | SRR17258732 (this paper) | KJ433990 | AB186123.1 | AB624361.1 (reference) | DRR241076 | DRR035925 | DRR068690 | SRR1333837-38 | SRR17258733 | DRR079253 | DRR039989 | DRR023337+40 | SRR5458683 | SRR9685281 | DRR006265 |
|---------------------------------|-----------|---------------|---------------|-------------|--------------------------|----------|------------|------------------------|-----------|-----------|-----------|---------------|-------------|-----------|-----------|--------------|------------|------------|-----------|
| DRR068691                       | 0         | 3.15          | 3.03          | 3.32        | 3.66                     | 2.17     | 2.46       | 3.66                   | 3.49      | 3.32      | 3.2       | 2.35          | 2.35        | 2.35      | 2.46      | 2.46         | 2.4        | 2.4        | 2.4       |
| SRR6324419-24                   | 3.15      | 0             | 1.26          | 4.41        | 4.75                     | 3.78     | 3.43       | 4.98                   | 4.86      | 4.69      | 4.58      | 3.49          | 3.43        | 3.43      | 3.55      | 3.55         | 3.49       | 3.49       | 3.49      |
| SRR11781560-1                   | 3.03      | 1.26          | 0             | 4.41        | 4.75                     | 3.83     | 3.49       | 4.86                   | 4.75      | 4.58      | 4.46      | 3.55          | 3.49        | 3.49      | 3.49      | 3.6          | 3.55       | 3.55       | 3.55      |
| SRR24542361                     | 3.32      | 4.41          | 4.41          | 0           | 0.69                     | 2.75     | 2.75       | 4.29                   | 4.23      | 3.89      | 3.89      | 2.69          | 2.63        | 2.63      | 2.75      | 2.75         | 2.69       | 2.69       | 2.69      |
| <b>SRR17258732 (this paper)</b> | 3.66      | 4.75          | 4.75          | 0.69        | 0                        | 3.15     | 3.32       | 4.69                   | 4.63      | 4.29      | 4.29      | 3.2           | 3.15        | 3.15      | 3.26      | 3.26         | 3.2        | 3.2        | 3.2       |
| KJ433990                        | 2.17      | 3.78          | 3.83          | 2.75        | 3.15                     | 0        | 1.43       | 2.86                   | 2.97      | 2.57      | 2.46      | 1.66          | 1.6         | 1.6       | 1.83      | 1.72         | 1.66       | 1.66       | 1.66      |
| AB186123.1                      | 2.46      | 3.43          | 3.49          | 2.75        | 3.32                     | 1.43     | 0          | 2.8                    | 2.86      | 2.52      | 2.4       | 1.77          | 1.72        | 1.72      | 1.89      | 1.83         | 1.77       | 1.77       | 1.77      |
| <b>AB624361.1 (reference)</b>   | 3.66      | 4.98          | 4.86          | 4.29        | 4.69                     | 2.86     | 2.8        | 0                      | 2.69      | 2.12      | 2         | 3.26          | 3.2         | 3.21      | 3.26      | 3.32         | 3.26       | 3.26       | 3.26      |
| DRR241076                       | 3.49      | 4.86          | 4.75          | 4.23        | 4.63                     | 2.97     | 2.86       | 2.69                   | 0         | 1.6       | 1.49      | 2.97          | 2.92        | 2.92      | 2.92      | 3.03         | 2.97       | 2.97       | 2.97      |
| DRR035925                       | 3.32      | 4.69          | 4.58          | 3.89        | 4.29                     | 2.57     | 2.52       | 2.12                   | 1.6       | 0         | 0.11      | 2.92          | 2.86        | 2.86      | 2.92      | 2.97         | 2.92       | 2.92       | 2.92      |
| DRR068690                       | 3.2       | 4.58          | 4.46          | 3.89        | 4.29                     | 2.46     | 2.4        | 2                      | 1.49      | 0.11      | 0         | 2.8           | 2.75        | 2.75      | 2.8       | 2.86         | 2.8        | 2.8        | 2.8       |
| SRR1333837-38                   | 2.35      | 3.49          | 3.55          | 2.69        | 3.2                      | 1.66     | 1.77       | 3.26                   | 2.97      | 2.92      | 2.8       | 0             | 0.06        | 0.06      | 0.29      | 0.17         | 0.11       | 0.11       | 0.11      |
| SRR17258733                     | 2.35      | 3.43          | 3.49          | 2.63        | 3.15                     | 1.6      | 1.72       | 3.2                    | 2.92      | 2.86      | 2.75      | 0.06          | 0           | 0         | 0.23      | 0.11         | 0.06       | 0.06       | 0.06      |
| DRR079253                       | 2.35      | 3.43          | 3.49          | 2.63        | 3.15                     | 1.6      | 1.72       | 3.21                   | 2.92      | 2.86      | 2.75      | 0.06          | 0           | 0         | 0.23      | 0.11         | 0.06       | 0.06       | 0.06      |
| DRR039989                       | 2.46      | 3.55          | 3.49          | 2.75        | 3.26                     | 1.83     | 1.89       | 3.26                   | 2.92      | 2.92      | 2.8       | 0.29          | 0.23        | 0.23      | 0         | 0.23         | 0.17       | 0.17       | 0.17      |
| DRR023337+40                    | 2.46      | 3.55          | 3.6           | 2.75        | 3.26                     | 1.72     | 1.83       | 3.32                   | 3.03      | 2.97      | 2.86      | 0.17          | 0.11        | 0.11      | 0.23      | 0            | 0.06       | 0.06       | 0.06      |
| SRR5458683                      | 2.4       | 3.49          | 3.55          | 2.69        | 3.2                      | 1.66     | 1.77       | 3.26                   | 2.97      | 2.92      | 2.8       | 0.11          | 0.06        | 0.06      | 0.17      | 0.06         | 0          | 0          | 0         |
| SRR9685281                      | 2.4       | 3.49          | 3.55          | 2.69        | 3.2                      | 1.66     | 1.77       | 3.26                   | 2.97      | 2.92      | 2.8       | 0.11          | 0.06        | 0.06      | 0.17      | 0.06         | 0          | 0          | 0         |
| DRR006265                       | 2.4       | 3.49          | 3.55          | 2.69        | 3.2                      | 1.66     | 1.77       | 3.26                   | 2.97      | 2.92      | 2.8       | 0.11          | 0.06        | 0.06      | 0.17      | 0.06         | 0          | 0          | 0         |

**Supplementary Table S8 – Raw Ct values for amplicons of housekeeping genes or viral genes in infected IOZCAS-*Ha*-I cells.**

| Ct values (average of 2 wells) for HKG and viral amplicons of infected samples |           |              |              |            |           |
|--------------------------------------------------------------------------------|-----------|--------------|--------------|------------|-----------|
| Timepoint                                                                      | Replicate | <i>α-Tub</i> | <i>RPS18</i> | <i>rep</i> | <i>cp</i> |
| Day 4                                                                          | 1         | 16.294       | 21.857       | 11.743     | 7.524     |
|                                                                                | 2         | 16.321       | 21.935       | 11.976     | 7.413     |
|                                                                                | 3         | 16.125       | 21.724       | 11.903     | 7.627     |
|                                                                                | 4         | 16.219       | 21.807       | 11.975     | 7.445     |
| Day 5                                                                          | 1         | 16.090       | 21.917       | 11.604     | 7.614     |
|                                                                                | 2         | 16.401       | 22.112       | 12.020     | 7.786     |
|                                                                                | 3         | 16.061       | 21.778       | 11.454     | 7.370     |
|                                                                                | 4         | 16.072       | 21.901       | 11.660     | 7.550     |

| Ct values (average of 2 wells) for HKGs of infected samples (replicate 1 of each timepoint) |              |              |            |
|---------------------------------------------------------------------------------------------|--------------|--------------|------------|
| Timepoint                                                                                   | <i>α-Tub</i> | <i>RPS18</i> | <i>18S</i> |
| T0                                                                                          | 17.196       | 23.251       | 7.394      |
| 4h                                                                                          | 17.622       | 23.022       | 7.574      |
| Day 1                                                                                       | 15.948       | 21.72        | 6.566      |
| Day 2                                                                                       | 15.44        | 21.534       | 6.196      |
| Day 3                                                                                       | 16.13        | 21.959       | 5.961      |
| Day 4                                                                                       | 16.414       | 21.991       | 6.098      |

**Supplementary Table S9 - Number of subjects at risk during *H. armigera* infection experiment.**

| <b>Day of event</b> | <b>Mock infected</b> | <b>BmLV infected</b> |
|---------------------|----------------------|----------------------|
| 0                   | 94                   | 96                   |
| 1                   | 94                   | 96                   |
| 2                   | 82                   | 83                   |
| 3                   | 70                   | 70                   |
| 6                   | 58                   | 58                   |
| 8                   |                      | 46                   |
| 12                  |                      | 45                   |
| 14                  | 45                   | 44                   |
| 15                  | 40                   | 41                   |
| 16                  | 39                   | 39                   |
| 17                  | 38                   | 38                   |
| 18                  | 37                   | 35                   |
| 19                  | 34                   | 34                   |
| 20                  | 27                   | 25                   |
| 21                  | 21                   | 21                   |
| 22                  | 15                   | 18                   |
| 23                  | 11                   | 16                   |
| 24                  | 8                    | 12                   |
| 25                  | 6                    | 9                    |
| 26                  |                      | 4                    |
| 27                  | 5                    |                      |
| 28                  | 3                    | 2                    |
| 29                  | 2                    | 1                    |
| 30                  | 1                    |                      |

2018

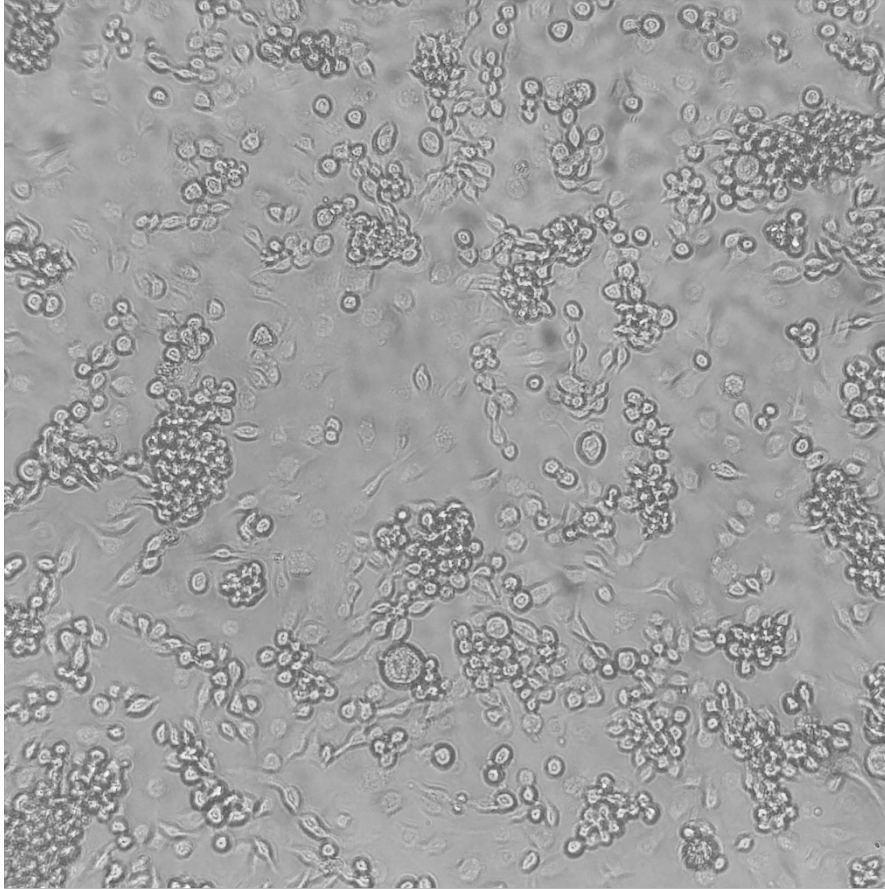

2022

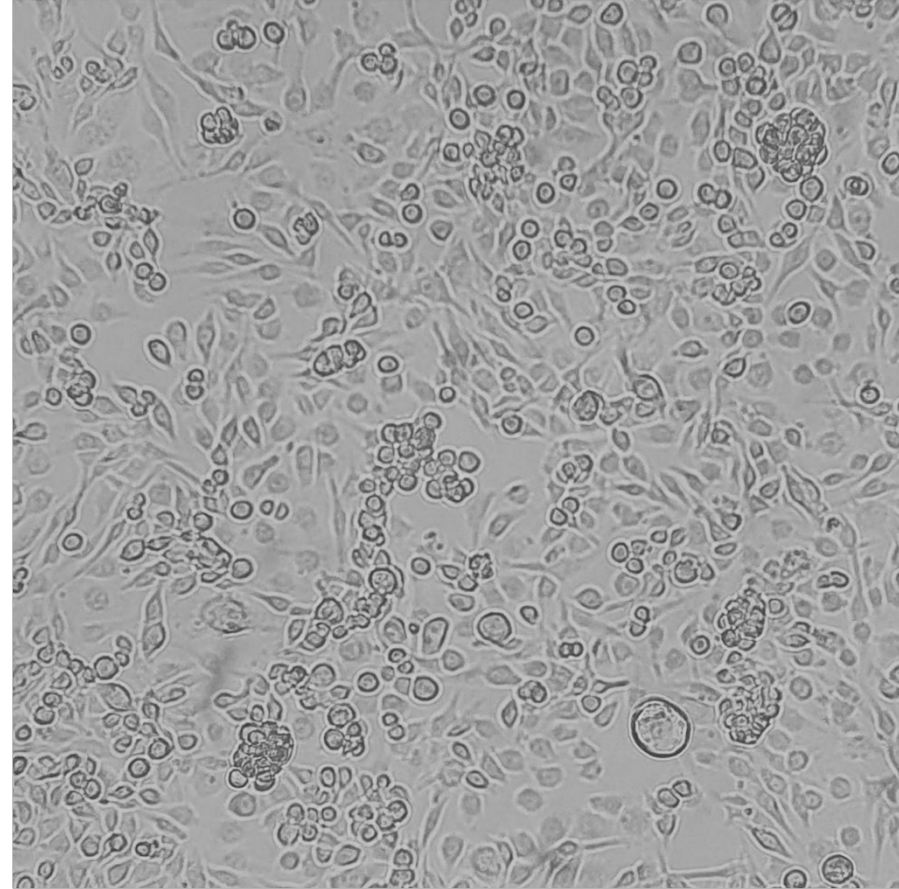

**Supplementary Figure S1 - Photomicrograph (100x magnification) of IOZCAS-*Ha-I* cells upon arrival in our lab in May 2018 (left) and IOZCAS-*Ha-I* cells on day 4 after the mock infection used for this study in 2022 (right). The form of the cells varies from spherical to spindle-shaped.**

### A - *Helicoverpa armigera*

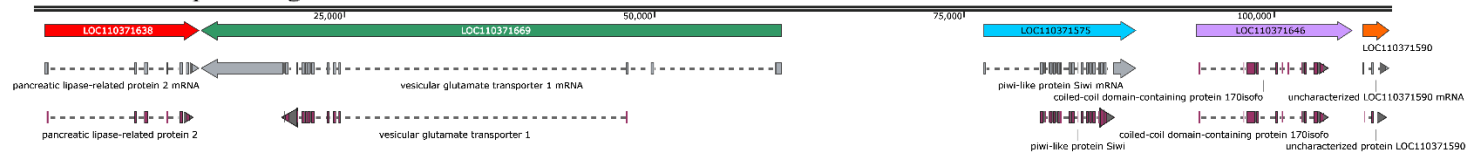

### B - *Trichoplusia ni*

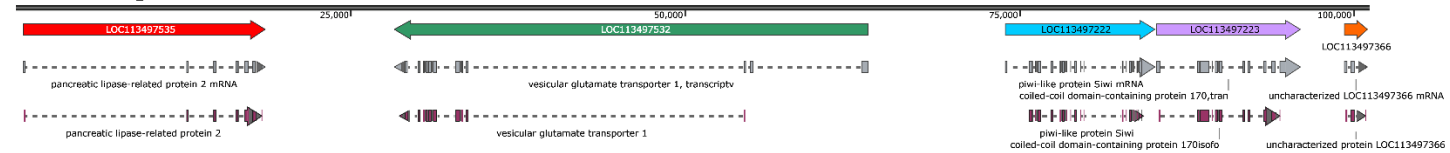

### C - *Helicoverpa armigera*

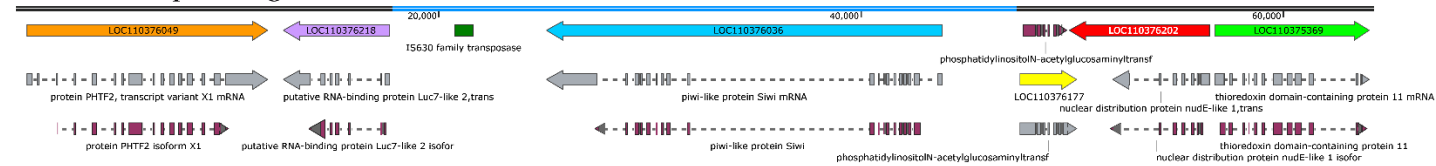

### D - *Trichoplusia ni*

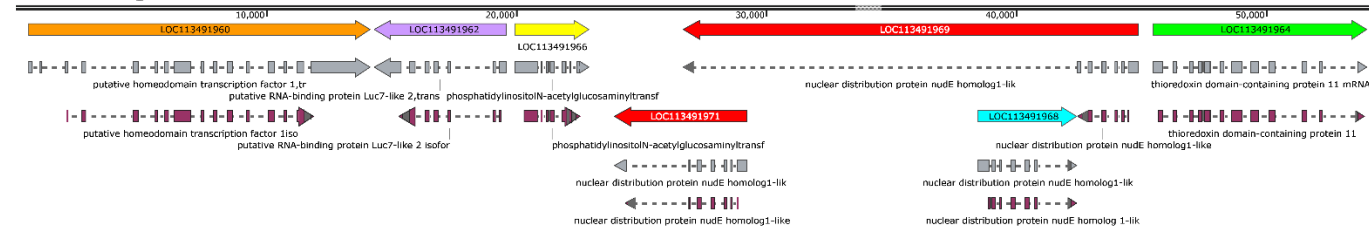

**Supplementary Figure S2 - Genomic loci of two *siwi* genes (blue arrow) in *Helicoverpa armigera* (A) (Chromosome 12, NC\_064787.1) and (C) (Chromosome 17, C\_064792.1), with the corresponding genomic loci in *Trichoplusia ni* (B) (Chromosome 9, NC\_039486.1) and (D)(Chromosome 3, NC\_039480.1), respectively. For simplicity, only one transcript variant and protein isoform are represented for each gene. The presumptive *H. armigera* transposed DNA sequence of figure C is indicated in blue. Data sourced from the National Center for Biotechnology Information.**

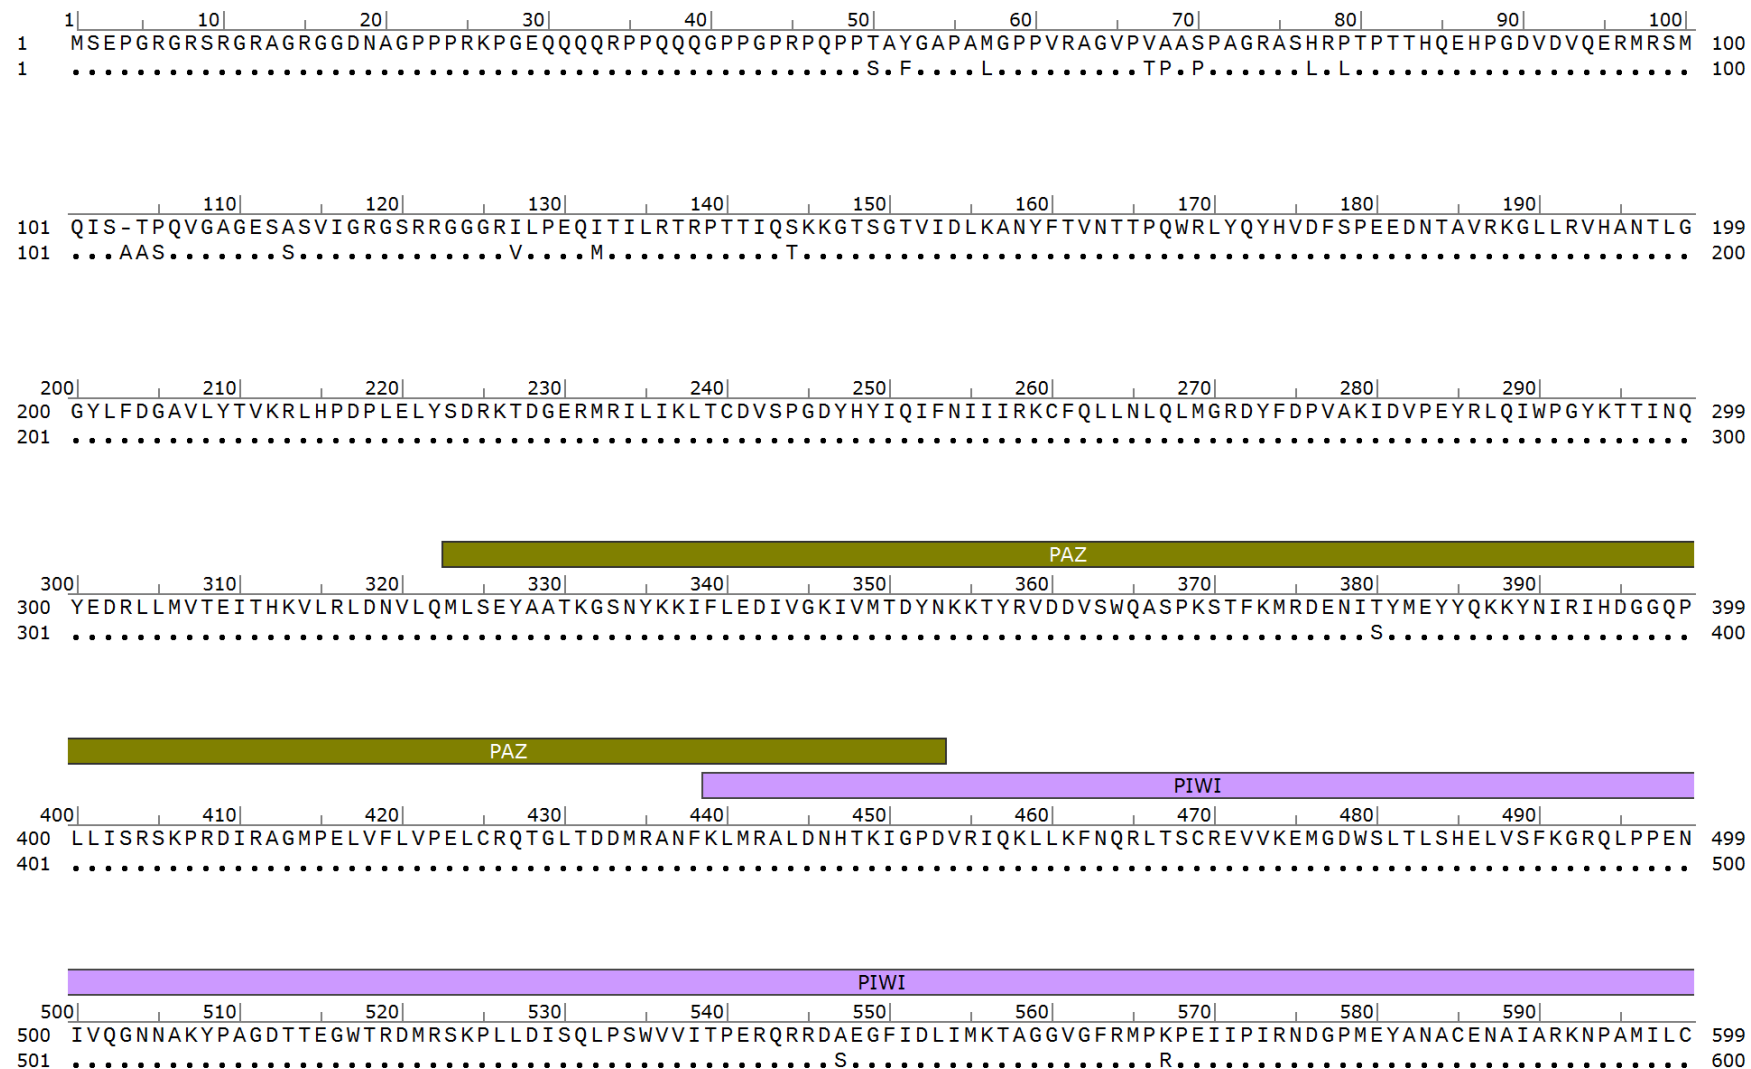

**Supplementary Figure S3 – Sequence alignment (from AA 1 to 600) of *H. armigera* SIWI proteins XP\_049696273.1 (upper row) and XP\_049699728.1 (lower row). Conserved domains predicted with the NCBI conserved domain search tool. Dots represent identical AAs. No mutations are present in the C-terminal region omitted from the figure.**

### Size distribution of total library reads

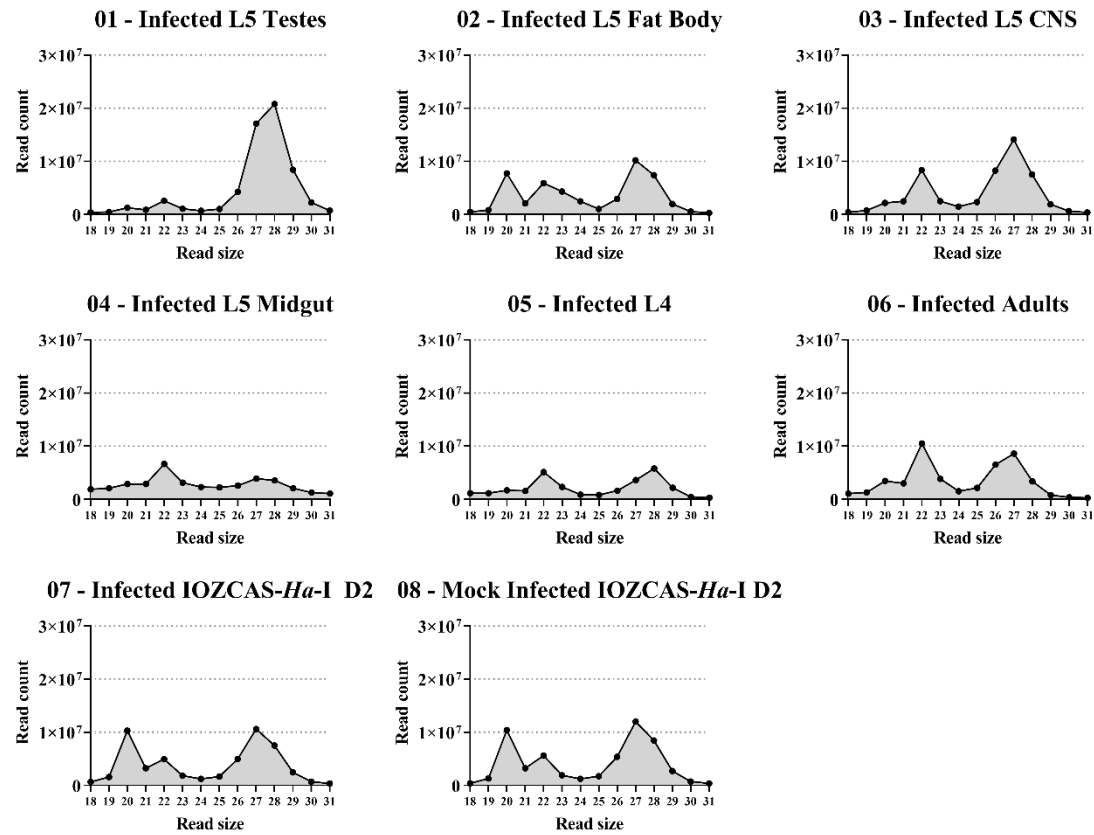

Supplementary Figure S4 – Size distribution of the total sRNA reads in the curated libraries for each sample.



### Reads mapping to *Trichoplusia ni* PiggyBac transposon

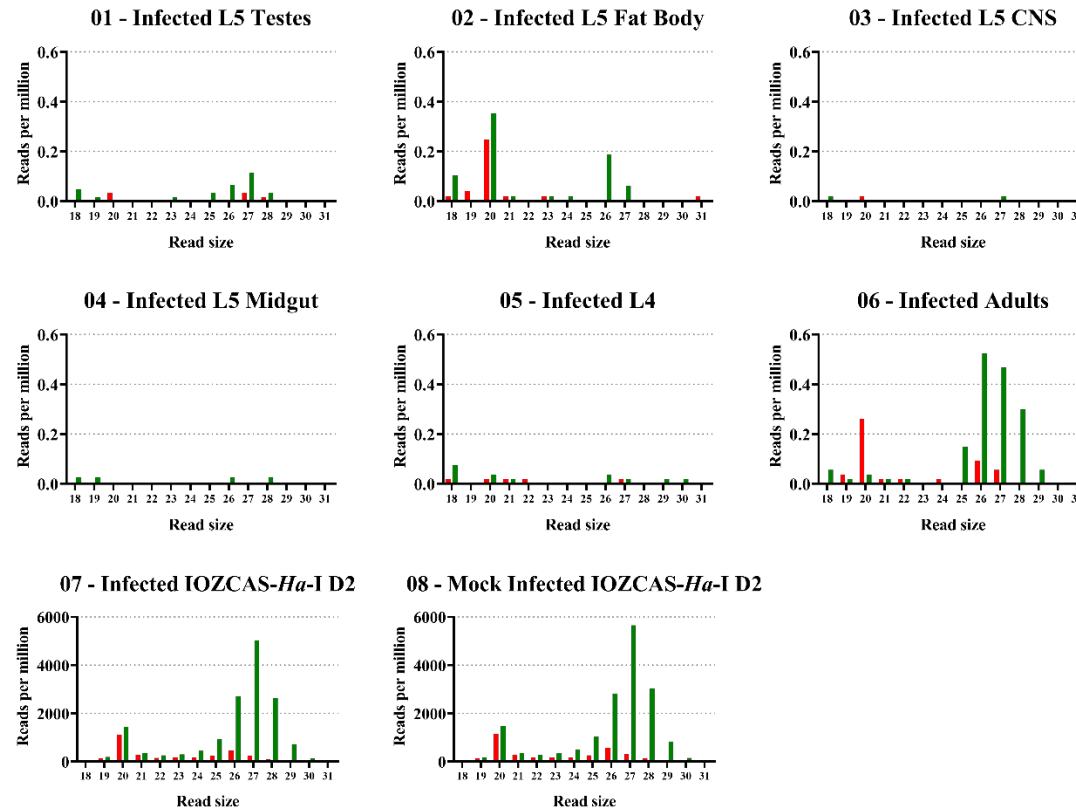

**Supplementary Figure S5 - Analysis of sRNAs mapping onto the *Trichoplusia ni* PiggyBac transposon (GenBank: DQ340395.1) sampled from *H. armigera* animals (samples 01 to 06) and *Trichoplusia* cells (samples 07 and 08). Tissues were dissected on day 6 after infection, whole larvae were collected on day 2 after infection, whole adults were collected on day 1 of the adult stage, and the cells were collected on day 2 after (mock) infection. The frequency of sRNAs mapping onto the PiggyBac sequence is expressed in reads per million and divided by the read size (from 18 to 31 nt).**

### A Sequence logo of 27nt sense and antisense reads mapping onto TEs

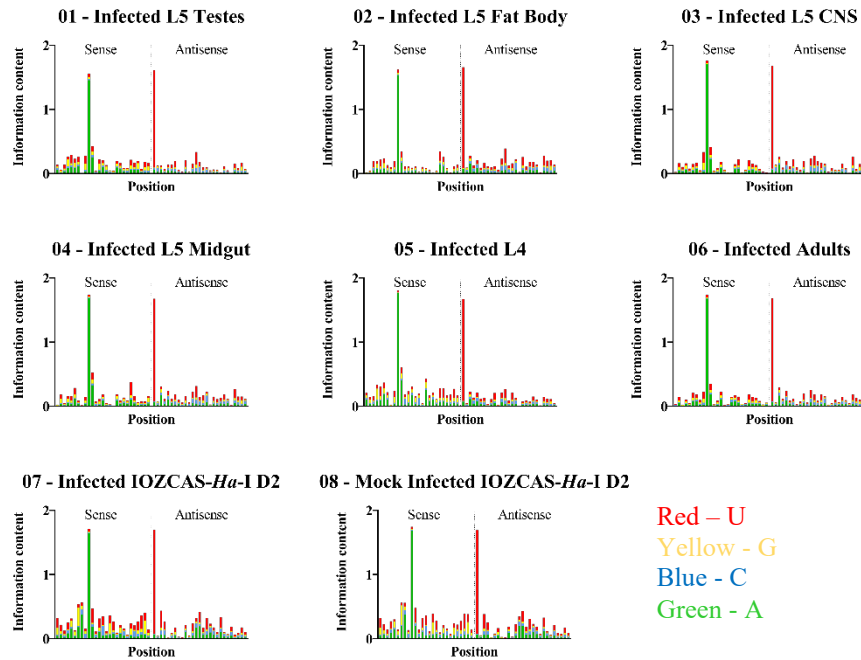

### B Distance plot of 27 nt reads mapping onto TEs

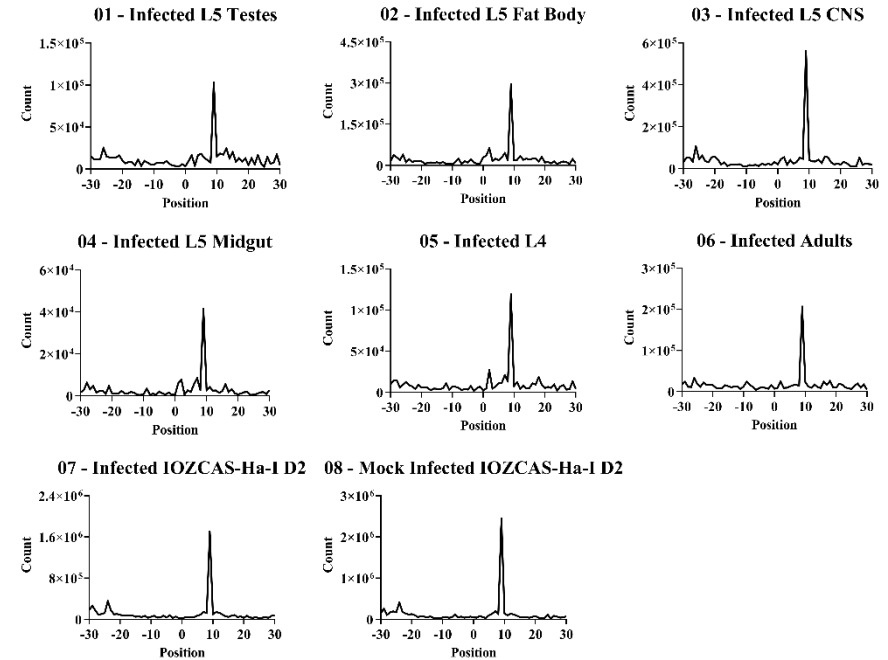

**Supplementary Figure S6 – Secondary piRNA biogenesis pathway fingerprint analysis for reads mapping onto transposable elements.** Tissues were dissected on day 6 after infection, whole larvae were collected on day 2 after infection, whole adults were collected on day 1 of the adult stage, and the cells were collected on day 2 after (mock) infection. (A) Nucleotide biases of 27 nt sized reads mapping onto transposable elements. Reads from *H. armigera* samples (01 till 06) were mapped onto the *HaRT1* sequence (GenBank: EU016079.1), reads from *Trichoplusia* samples (07 and 08) were mapped onto a PiggyBac transposon sequence (GenBank: DQ340395.1). For all samples, sense reads display a strong bias for an adenine on the 10<sup>th</sup> position whereas antisense reads have a strong bias towards an uracil on the 1<sup>st</sup> position. Information content (Y-axis) calculated according to the formula of Schneider and Stephens (1990). (B) Read distance plot of 27 nt reads mapping onto the same TEs. For all samples, a clear peak is seen at a distance of 9 nucleotides.

## A Sequence logo of 27 nt sense and antisense reads mapping onto BmLV

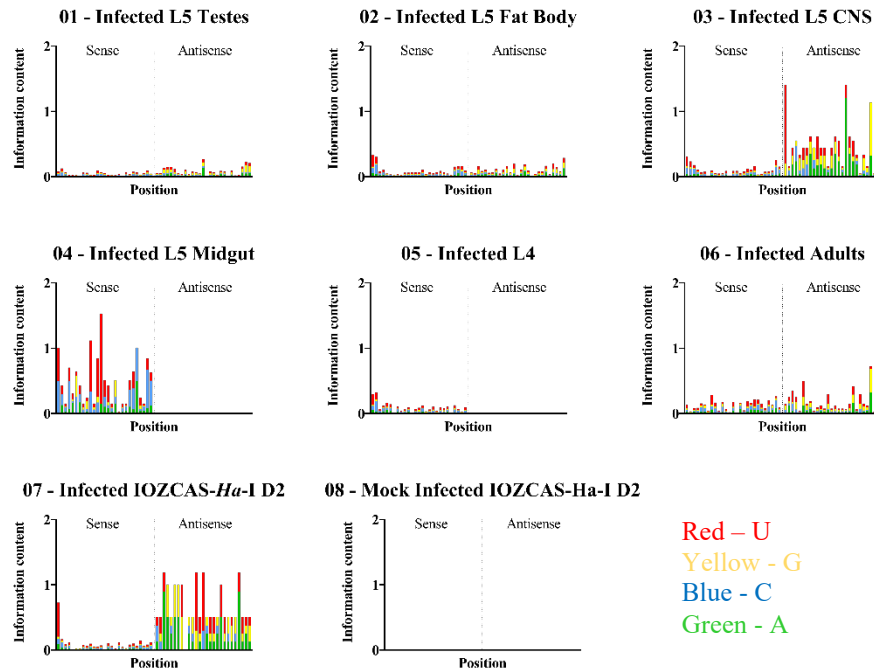

## B Distance plot of 27 nt reads mapping onto BmLV

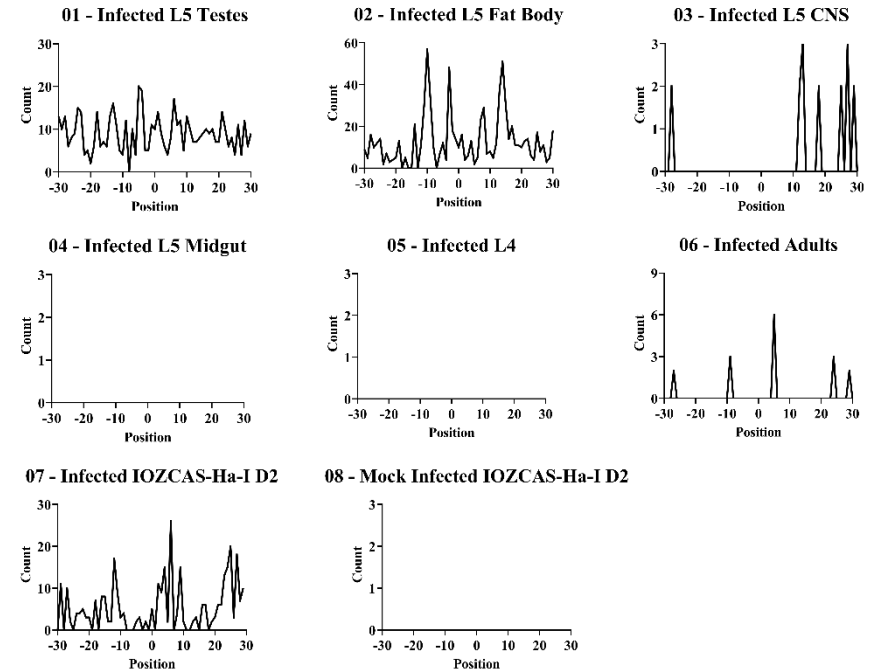

**Supplementary Figure S7 - Secondary piRNA biogenesis pathway fingerprint analysis for reads mapping onto BmLV. Tissues were dissected on day 6 after infection, whole larvae were collected on day 2 after infection, whole adults were collected on day 1 of the adult stage, and the cells were collected on day 2 after (mock) infection. (A) Nucleotide biases of 27 nt sized reads mapping onto BmLV. No 1U or 10A nucleotide biases are found except for antisense reads from CNS where a 1U bias is present. Information content calculated according to the formula of Schneider and Stephens (1990). (B) Read distance plot of 27 nt reads mapping onto BmLV. No clear 9 nt distance peak is present in any sample.**

**Supplementary text S1 – Multiple sequence alignment of replicase polypeptides assembled from publicly available SRA datasets. Sequences aligned with MEGA7 (version 7.0.26) and then visualized with MView (version 1.63). Amino acids are colored according to their identity.**

|                  | cov    | pid    | 1                                                                                  | 80  |
|------------------|--------|--------|------------------------------------------------------------------------------------|-----|
| 1 DRR068690      | 100.0% | 100.0% | MAFTNLVDTLANTIHRDAITAPLVETAINNFRHKQLYPYQVNSKLIPLLNLGIGVTSYGTSPHFHAAHKAETHLLFE      |     |
| 2 DRR068691      | 100.0% | 96.8%  | MAFTNLVDTLANTIHRDAITAPLVETAINNFRHKQLYPYQVNSKLIPLLNLGIGVTSYGTSPHFHAAHKAETHLLFE      |     |
| 3 DRR006265      | 100.0% | 97.2%  | MAFTNLVDTLANTIHRDAITAPLVETAINNFRHKQLYPYQVNSKLIPLLNLGIGVTSYGTSPHFHAAHKAETHLLFE      |     |
| 4 DRR039989      | 99.9%  | 97.1%  | MAFTNLVDTLANTIHRDAITAPLVETAINNFRHKQLYPYQVNSKLIPLLNLGIGVTSYGTSPHFHAAHKAETHLLFE      |     |
| 5 DRR079253      | 99.9%  | 97.2%  | MAFTNLVDTLANTIHRDAITAPLVETAINNFRHKQLYPYQVNSKLIPLLNLGIGVTSYGTSPHFHAAHKAETHLLFE      |     |
| 6 SRR6324419-24  | 100.0% | 95.4%  | MAFTNLVDTLANTIHRDAITAPLVETAINNFRHKQLYPYQVNSKLIPLLNLGIGVTSYGTSPHFHAAHKAETHLLFE      |     |
| 7 SRR11781560-1  | 100.0% | 95.5%  | MAFTNLVDTLANTIHRDAITAPLVETAINNFRHKQLYPYQVNSKLIPLLNLGIGVTSYGTSPHFHAAHKAETHLLFE      |     |
| 8 SRR5458683     | 100.0% | 97.2%  | MAFTNLVDTLANTIHRDAITAPLVETAINNFRHKQLYPYQVNSKLIPLLNLGIGVTSYGTSPHFHAAHKAETHLLFE      |     |
| 9 DRR023337+40   | 100.0% | 97.1%  | MAFTNLVDTLANTIHRDAITAPLVETAINNFRHKQLYPYQVNSKLIPLLNLGIGVTSYGTSPHFHAAHKAETHLLFE      |     |
| 10 SRR1333837-38 | 100.0% | 97.2%  | MAFTNLVDTLANTIHRDAITAPLVETAINNFRHKQLYPYQVNSKLIPLLNLGIGVTSYGTSPHFHAAHKAETHLLFE      |     |
| 11 DRR241076     | 100.0% | 98.5%  | MAFTNLVDTLANTIHRDAITAPLVETAINNFRHKQLYPYQVNSKLIPLLNLGIGVTSYGTSPHFHAAHKAETHLLFE      |     |
| 12 SRR17258733   | 100.0% | 97.3%  | MAFTNLVDTLANTIHRDAITAPLVETAINNFRHKQLYPYQVNSKLIPLLNLGIGVTSYGTSPHFHAAHKAETHLLFE      |     |
| 13 SRR24542361   | 100.0% | 96.1%  | MAFTNLVDTLANTIHRDAITAPLVETAINNFRHKQLYPYQVNSKLIPLLNLGIGVTSYGTSPHFHAAHKAETHLLFE      |     |
| 14 SRR17258732   | 100.0% | 95.7%  | MAFTNLVDTLANTIHRDAITAPLVETAINNFRHKQLYPYQVNSKLIPLLNLGIGVTSYGTSPHFHAAHKAETHLLFE      |     |
| 15 SRR9685281    | 100.0% | 97.2%  | MAFTNLVDTLANTIHRDAITAPLVETAINNFRHKQLYPYQVNSKLIPLLNLGIGVTSYGTSPHFHAAHKAETHLLFE      |     |
| 16 DRR035925     | 100.0% | 99.9%  | MAFTNLVDTLANTIHRDAITAPLVETAINNFRHKQLYPYQVNSKLIPLLNLGIGVTSYGTSPHFHAAHKAETHLLFE      |     |
| 17 AB186123.1    | 99.9%  | 97.5%  | MAFTNLVDTLANTIHRDAITAPLVETAINNFRHKQLYPYQVNSKLIPLLNLGIGVTSYGTSPHFHAAHKAETHLLFE      |     |
| 18 KJ433990      | 100.0% | 97.5%  | MAFTNLVDTLANTIHRDAITAPLVETAINNFRHKQLYPYQVNSKLIPLLNLGIGVTSYGTSPHFHAAHKAETHLLFE      |     |
| 19 AB624361.1    | 100.0% | 97.3%  | MAFTNLVDTLANTIHRDAITAPLVETAINNFRHKQLYPYQVNSKLIPLLNLGIGVTSYGTSPHFHAAHKAETHLLFE      |     |
| consensus/100%   |        |        | MAFTNLVDTLANIHRDAITAPLVETAINNFRHKQLYPYQVNSKLIPLLNLGIGVTSYGTSPHFHAAHKAETHLLFE       |     |
| consensus/90%    |        |        | MAFTNLVDTLANTIHRDAITAPLVETAINNFRHKQLYPYQVNSKLIPLLNLGIGVTSYGTSPHFHAAHKAETHLLFE      |     |
| consensus/80%    |        |        | MAFTNLVDTLANTIHRDAITAPLVETAINNFRHKQLYPYQVNSKLIPLLNLGIGVTSYGTSPHFHAAHKAETHLLFE      |     |
| consensus/70%    |        |        | MAFTNLVDTLANTIHRDAITAPLVETAINNFRHKQLYPYQVNSKLIPLLNLGIGVTSYGTSPHFHAAHKAETHLLFE      |     |
|                  | cov    | pid    | 81                                                                                 | 160 |
| 1 DRR068690      | 100.0% | 100.0% | HWNHLLARVPSTVMYMKPEKFQKLQQLNENFASLINFRHTPKDITRYPVSNPHPVETEVAFMHDAALMEITPSQILGLFKDS |     |
| 2 DRR068691      | 100.0% | 96.8%  | HWNHLLARVPSTVMYMKPEKFQKLQQLNENFASLINFRHTPKDITRYPVSNPHPVETEVAFMHDAALMEITPSQILGLFKDS |     |
| 3 DRR006265      | 100.0% | 97.2%  | HWNHLLARVPSTVMYMKPEKFQKLQQLNENFASLINFRHTPKDITRYPVSNPHPVETEVAFMHDAALMEITPSQILGLFKDS |     |
| 4 DRR039989      | 99.9%  | 97.1%  | HWNHLLARVPSTVMYMKPEKFQKLQQLNENFASLINFRHTPKDITRYPVSNPHPVETEVAFMHDAALMEITPSQILGLFKDS |     |
| 5 DRR079253      | 99.9%  | 97.2%  | HWNHLLARVPSTVMYMKPEKFQKLQQLNENFASLINFRHTPKDITRYPVSNPHPVETEVAFMHDAALMEITPSQILGLFKDS |     |
| 6 SRR6324419-24  | 100.0% | 95.4%  | HWNHLLARVPSTVMYMKPEKFQKLQQLNENFASLINFRHTPKDITRYPVSNPHPVETEVAFMHDAALMEITPSQILGLFKDS |     |
| 7 SRR11781560-1  | 100.0% | 95.5%  | HWNHLLARVPSTVMYMKPEKFQKLQQLNENFASLINFRHTPKDITRYPVSNPHPVETEVAFMHDAALMEITPSQILGLFKDS |     |
| 8 SRR5458683     | 100.0% | 97.2%  | HWNHLLARVPSTVMYMKPEKFQKLQQLNENFASLINFRHTPKDITRYPVSNPHPVETEVAFMHDAALMEITPSQILGLFKDS |     |
| 9 DRR023337+40   | 100.0% | 97.1%  | HWNHLLARVPSTVMYMKPEKFQKLQQLNENFASLINFRHTPKDITRYPVSNPHPVETEVAFMHDAALMEITPSQILGLFKDS |     |
| 10 SRR1333837-38 | 100.0% | 97.2%  | HWNHLLARVPSTVMYMKPEKFQKLQQLNENFASLINFRHTPKDITRYPVSNPHPVETEVAFMHDAALMEITPSQILGLFKDS |     |
| 11 DRR241076     | 100.0% | 98.5%  | HWNHLLARVPSTVMYMKPEKFQKLQQLNENFASLINFRHTPKDITRYPVSNPHPVETEVAFMHDAALMEITPSQILGLFKDS |     |
| 12 SRR17258733   | 100.0% | 97.3%  | HWNHLLARVPSTVMYMKPEKFQKLQQLNENFASLINFRHTPKDITRYPVSNPHPVETEVAFMHDAALMEITPSQILGLFKDS |     |
| 13 SRR24542361   | 100.0% | 96.1%  | HWNHLLARVPSTVMYMKPEKFQKLQQLNENFASLINFRHTPKDITRYPVSNPHPVETEVAFMHDAALMEITPSQILGLFKDS |     |
| 14 SRR17258732   | 100.0% | 95.7%  | HWNHLLARVPSTVMYMKPEKFQKLQQLNENFASLINFRHTPKDITRYPVSNPHPVETEVAFMHDAALMEITPSQILGLFKDS |     |

|    |                |        |        |                                                                                   |
|----|----------------|--------|--------|-----------------------------------------------------------------------------------|
| 15 | SRR9685281     | 100.0% | 97.2%  | HWNNLARVPSTVMYMKKEKFQKLQQTENFASLINFRHTPKDITRYPVSNPHPVETEVAFMHDAIMFITPSQILGLFKDS   |
| 16 | DRR035925      | 100.0% | 99.9%  | HWNNLARVPSTVMYMKKEKFQKLQQTENFASLINFRHTPKDITRYPVSNPHPVETEVAFMHDAIMFITPSQILGLFKDS   |
| 17 | AB186123.1     | 99.9%  | 97.5%  | HWNNLARVPSTVMYMKKEKFQKLQQTENFASLINFRHTPKDITRYPVSNPHPVETEVAFMHDAIMFITPSQILGLFKDS   |
| 18 | KJ433990       | 100.0% | 97.5%  | HWNNLARVPSTVMYMKKEKFQKLQQTENFASLINFRHTPKDITRYPVSNPHPVETEVAFMHDAIMFITPSQILGLFKDS   |
| 19 | AB624361.1     | 100.0% | 97.3%  | HWNNLARVPSTVMYMKKEKFQKLQQTENFASLINFRHTPKDITRYPVSNPHPVETEVAFMHDAIMFITPSQILGLFKDS   |
|    | consensus/100% |        |        | HWNNLARVPSTVMYMKKEKFQKLQQTENFASLINFRHTPKDITRYPVSNPHPVETEVAFMHDAIMFITPSQILGLFKDS   |
|    | consensus/90%  |        |        | HWNNLARVPSTVMYMKKEKFQKLQQTENFASLINFRHTPKDITRYPVSNPHPVETEVAFMHDAIMFITPSQILGLFKDS   |
|    | consensus/80%  |        |        | HWNNLARVPSTVMYMKKEKFQKLQQTENFASLINFRHTPKDITRYPVSNPHPVETEVAFMHDAIMFITPSQILGLFKDS   |
|    | consensus/70%  |        |        | HWNNLARVPSTVMYMKKEKFQKLQQTENFASLINFRHTPKDITRYPVSNPHPVETEVAFMHDAIMFITPSQILGLFKDS   |
|    |                | cov    | pid    | 261                                                                               |
| 1  | DRR068690      | 100.0% | 100.0% | PSMTSLYCSLIVPAEAAAGVPSLFPDLYSYTIKDDQLVYTLEGNATGNYTQPLRSIDWLRRSGISSGDLHLSVTLLSFV   |
| 2  | DRR068691      | 100.0% | 96.8%  | PSMTSLYCSLIVPAEAAAGVPSLFPDLYSYTIKDDQLVYTLEGNATGNYTQPLRSIDWLRRSGISSGDLHLSVTLLSFV   |
| 3  | DRR006265      | 100.0% | 97.2%  | PSMTSLYCSLIVPAEAAAGVPSLFPDLYSYTIKDDQLVYSLEGNATGNYTQPLRSIDWLRRSGISSGDLHLSVTLLSFV   |
| 4  | DRR039989      | 99.9%  | 97.1%  | PSMTSLYCSLIVPAEAAAGVPSLFPDLYSYTIKDDQLVYSLEGNATGNYTQPLRSIDWLRRSGISSGDLHLSVTLLSFV   |
| 5  | DRR079253      | 99.9%  | 97.2%  | PSMTSLYCSLIVPAEAAAGVPSLFPDLYSYTIKDDQLVYSLEGNATGNYTQPLRSIDWLRRSGISSGDLHLSVTLLSFV   |
| 6  | SRR6324419-24  | 100.0% | 95.4%  | PSMTSLYCSLIVPAEAAAGVPSLFPDLYSYTIKDDQLVYTLEGNATGNYTQPLRSIDWLRRSGISSGDLHLSVTLLSFV   |
| 7  | SRR11781560-1  | 100.0% | 95.5%  | PSMTSLYCSLIVPAEAAAGVPSLFPDLYSYTIKDDQLVYTLEGNATGNYTQPLRSIDWLRRSGISSGDLHLSVTLLSFV   |
| 8  | SRR5458683     | 100.0% | 97.2%  | PSMTSLYCSLIVPAEAAAGVPSLFPDLYSYTIKDDQLVYSLEGNATGNYTQPLRSIDWLRRSGISSGDLHLSVTLLSFV   |
| 9  | DRR023337+40   | 100.0% | 97.1%  | PSMTSLYCSLIVPAEAAAGVPSLFPDLYSYTIKDDQLVYSLEGNATGNYTQPLRSIDWLRRSGISSGDLHLSVTLLSFV   |
| 10 | SRR1333837-38  | 100.0% | 97.2%  | PSMTSLYCSLIVPAEAAAGVPSLFPDLYSYTIKDDQLVYSLEGNATGNYTQPLRSIDWLRRSGISSGDLHLSVTLLSFV   |
| 11 | DRR241076      | 100.0% | 98.5%  | PSMTSLYCSLIVPAEAAAGVPSLFPDLYSYTIKDDQLVYTLEGNATGNYTQPLRSIDWLRRSGISSGDLHLSVTLLSFV   |
| 12 | SRR17258733    | 100.0% | 97.3%  | PSMTSLYCSLIVPAEAAAGVPSLFPDLYSYTIKDDQLVYSLEGNATGNYTQPLRSIDWLRRSGISSGDLHLSVTLLSFV   |
| 13 | SRR24542361    | 100.0% | 96.1%  | PSMTSLYCSLIVPAEAAAGVPSLFPDLYSYTIKDDQLVYSLEGNATGNYTQPLRSIDWLRRSGISSGDLHLSVTLLSFV   |
| 14 | SRR17258732    | 100.0% | 95.7%  | PSMTSLYCSLIVPAEAAAGVPSLFPDLYSYTIKDDQLVYSLEGNATGNYTQPLRSIDWLRRSGISSGDLHLSVTLLSFV   |
| 15 | SRR9685281     | 100.0% | 97.2%  | PSMTSLYCSLIVPAEAAAGVPSLFPDLYSYTIKDDQLVYSLEGNATGNYTQPLRSIDWLRRSGISSGDLHLSVTLLSFV   |
| 16 | DRR035925      | 100.0% | 99.9%  | PSMTSLYCSLIVPAEAAAGVPSLFPDLYSYTIKDDQLVYTLEGNATGNYTQPLRSIDWLRRSGISSGDLHLSVTLLSFV   |
| 17 | AB186123.1     | 99.9%  | 97.5%  | PSMTSLYCSLIVPAEAAAGVPSLFPDLYSYTIKDDQLVYTLEGNATGNYTQPLRSIDWLRRSGISSGDLHLSVTLLSFV   |
| 18 | KJ433990       | 100.0% | 97.5%  | PSMTSLYCSLIVPAEAAAGVPSLFPDLYSYTIKDDQLVYTLEGNATGNYTQPLRSIDWLRRSGISSGDLHLSVTLLSFV   |
| 19 | AB624361.1     | 100.0% | 97.3%  | PSMTSLYCSLIVPAEAAAGVPSLFPDLYSYTIKDDQLVYTLEGNATGNYTQPLRSIDWLRRSGISSGDLHLSVTLLSFV   |
|    | consensus/100% |        |        | PSMTSLYCSLIVPAEAAAGVPSLFPDLYSYTIKDDQLVYOLEGNATGNYTQPLRSIDWLRRSGISSGDLHLSVTLLSFV   |
|    | consensus/90%  |        |        | PSMTSLYCSLIVPAEAAAGVPSLFPDLYSYTIKDDQLVYOLEGNATGNYTQPLRSIDWLRRSGISSGDLHLSVTLLSFV   |
|    | consensus/80%  |        |        | PSMTSLYCSLIVPAEAAAGVPSLFPDLYSYTIKDDQLVYOLEGNATGNYTQPLRSIDWLRRSGISSGDLHLSVTLLSFV   |
|    | consensus/70%  |        |        | PSMTSLYCSLIVPAEAAAGVPSLFPDLYSYTIKDDQLVYOLEGNATGNYTQPLRSIDWLRRSGISSGDLHLSVTLLSFV   |
|    |                | cov    | pid    | 241                                                                               |
| 1  | DRR068690      | 100.0% | 100.0% | SVHSLIITRVPPPPSCHEVFLTPPASLLPNPEGIEELPIKSRLVPTDEVYNSLFTYVRAVRTLRVTDESGFVRTQORQKEH |
| 2  | DRR068691      | 100.0% | 96.8%  | SVHSLIITRVPPPPSCHEVFLTPPASLLPNPEGIEELPIKSRLVPTDEVYNSLFTYVRAVRTLRVTDESGFVRTQORQKEH |
| 3  | DRR006265      | 100.0% | 97.2%  | SVHSLIITRVPPPPSCHEVFLTPPASLLPNPEGIEELPIKSRLVPTDEVYNSLFTYVRAVRTLRVTDESGFVRTQORQKEH |
| 4  | DRR039989      | 99.9%  | 97.1%  | SVHSLIITRVPPPPSCHEVFLTPPASLLPNPEGIEELPIKSRLVPTDEVYNSLFTYVRAVRTLRVTDESGFVRTQORQKEH |
| 5  | DRR079253      | 99.9%  | 97.2%  | SVHSLIITRVPPPPSCHEVFLTPPASLLPNPEGIEELPIKSRLVPTDEVYNSLFTYVRAVRTLRVTDESGFVRTQORQKEH |
| 6  | SRR6324419-24  | 100.0% | 95.4%  | SVHSLIITRVPPPPSCHEVFLTPPASLLPNPEGIEELPIKSRLVPTDEVYNSLFTYVRAVRTLRVTDESGFVRTQORQKEH |
| 7  | SRR11781560-1  | 100.0% | 95.5%  | SVHSLIITRVPPPPSCHEVFLTPPASLLPNPEGIEELPIKSRLVPTDEVYNSLFTYVRAVRTLRVTDESGFVRTQORQKEH |
| 8  | SRR5458683     | 100.0% | 97.2%  | SVHSLIITRVPPPPSCHEVFLTPPASLLPNPEGIEELPIKSRLVPTDEVYNSLFTYVRAVRTLRVTDESGFVRTQORQKEH |

|    |                |        |       |                                                                                  |
|----|----------------|--------|-------|----------------------------------------------------------------------------------|
| 9  | DRR023337+40   | 100.0% | 97.1% | SVHSLLI TRVPQPPPSCEHVFLTPPASLLNPEGLELPISKRLVPTEVYDSLFITYVRAVRTLRVTDPSGFVTRORQKEH |
| 10 | SRR1333837-38  | 100.0% | 97.2% | SVHSLLI TRVPQPPPSCEHVFLTPPASLLNPEGLELPISKRLVPTEVYDSLFITYVRAVRTLRVTDPSGFVTRORQKEH |
| 11 | DRR241076      | 100.0% | 98.5% | SVHSLLI TRVPQPPPSCEHVFLTPPASLLNPEGLELPISKRLVPTEVYNSLFITYVRAVRTLRVTDPSGFVTRORQKEH |
| 12 | SRR17258733    | 100.0% | 97.3% | SVHSLLI TRVPQPPPSCEHVFLTPPASLLNPEGLELPISKRLVPTEVYDSLFITYVRAVRTLRVTDPSGFVTRORQKEH |
| 13 | SRR24542361    | 100.0% | 96.1% | SVHSLLI TRVPQPPPSCEHVFLTPPASLLNPEGLELPISKRLVPTEVYNSLFITYVRAVRTLRVTDPSGFVTRORQKEH |
| 14 | SRR17258732    | 100.0% | 95.7% | SVHSLLI TRVPQPPPSCEHVFLTPPASLLNPEGLELPISKRLVPTEVYNSLFITYVRAVRTLRVTDPSGFVTRORQKEH |
| 15 | SRR9685281     | 100.0% | 97.2% | SVHSLLI TRVPQPPPSCEHVFLTPPASLLNPEGLELPISKRLVPTEVYDSLFITYVRAVRTLRVTDPSGFVTRORQKEH |
| 16 | DRR035925      | 100.0% | 99.9% | SVHSLLI TRVPQPPPSCEHVFLTPPASLLNPEGLELPISKRLVPTEVYNSLFITYVRAVRTLRVTDPSGFVTRORQKEH |
| 17 | AB186123.1     | 99.9%  | 97.5% | SVHSLLI TRVPQPPPSCEHVFLTPPASLLNPEGLELPISKRLVPTEVYNSLFITYVRAVRTLRVTDPSGFVTRORQKEH |
| 18 | KJ433990       | 100.0% | 97.5% | SVHSLLI TRVPQPPPSCEHVFLTPPASLLNPEGLELPISKRLVPTEVYNSLFITYVRAVRTLRVTDPSGFVTRORQKEH |
| 19 | AB624361.1     | 100.0% | 97.3% | SVHSLLI TRVPQPPPSCEHVFLTPPASLLNPEGLELPISKRLVPTEVYNSLFITYVRAVRTLRVTDPSGFVTRORQKEH |
|    | consensus/100% |        |       | SVHSLLI TRVPQPPPSCEHVFLTPPASLLNPEGLELPISKRLVPTEVYNSLFITYVRAVRTLRVTDPSGFVTRORQKEH |
|    | consensus/90%  |        |       | SVHSLLI TRVPQPPPSCEHVFLTPPASLLNPEGLELPISKRLVPTEVYNSLFITYVRAVRTLRVTDPSGFVTRORQKEH |
|    | consensus/80%  |        |       | SVHSLLI TRVPQPPPSCEHVFLTPPASLLNPEGLELPISKRLVPTEVYNSLFITYVRAVRTLRVTDPSGFVTRORQKEH |
|    | consensus/70%  |        |       | SVHSLLI TRVPQPPPSCEHVFLTPPASLLNPEGLELPISKRLVPTEVYNSLFITYVRAVRTLRVTDPSGFVTRORQKEH |

|    |                |        |        |                                                                                 |   |   |   |   |     |
|----|----------------|--------|--------|---------------------------------------------------------------------------------|---|---|---|---|-----|
|    | cov            | pid    | 321    | .                                                                               | : | . | . | 4 | 400 |
| 1  | DRR068690      | 100.0% | 100.0% | SWVQSSAWDNLANFALLTCSARPSLEYGFCYSSYKLLSIWIVRTLRSISAYHTGSLTIPILHHLSPYQLCYRTHTFRWL |   |   |   |   |     |
| 2  | DRR068691      | 100.0% | 96.8%  | SWVQSSAWDNLANFALLTCSARPSLEYGFCYSSYKLLSIWIMRTLRSISAYHTGSLTIPILHHLSPYQLCYRTHTFRWL |   |   |   |   |     |
| 3  | DRR006265      | 100.0% | 97.2%  | SWVQSSAWDNLANFALLTCSARPSLEYGFCYSSYKLLSIWIVRTLRSISAYHTGSLTIPILHHLSPYQLCYRTHTFRWL |   |   |   |   |     |
| 4  | DRR039989      | 99.9%  | 97.1%  | SWVQSSAWDNLANFALLTCSARPSLEYGFCYSSYKLLSIWIVRTLRSISAYHTGSLTIPILHHLSPYQLCYRTHTFRWL |   |   |   |   |     |
| 5  | DRR079253      | 99.9%  | 97.2%  | SWVQSSAWDNLANFALLTCSARPSLEYGFCYSSYKLLSIWIVRTLRSISAYHTGSLTIPILHHLSPYQLCYRTHTFRWL |   |   |   |   |     |
| 6  | SRR6324419-24  | 100.0% | 95.4%  | SWVQSSAWDNLANFALLTCSARPSLEYGFCYSSYKLLSIWIMRTLRSISAYHTGSLTIPILHHLSPYQLCYRTHTFRWL |   |   |   |   |     |
| 7  | SRR11781560-1  | 100.0% | 95.5%  | SWVQSSAWDNLANFALLTCSARPSLEYGFCYSSYKLLSIWIMRTLRSISAYHTGSLTIPILHHLSPYQLCYRTHTFRWL |   |   |   |   |     |
| 8  | SRR5458683     | 100.0% | 97.2%  | SWVQSSAWDNLANFALLTCSARPSLEYGFCYSSYKLLSIWIVRTLRSISAYHTGSLTIPILHHLSPYQLCYRTHTFRWL |   |   |   |   |     |
| 9  | DRR023337+40   | 100.0% | 97.1%  | SWVQSSAWDNLANFALLTCSARPSLEYGFCYSSYKLLSIWIVRTLRSISAYHTGSLTIPILHHLSPYQLCYRTHTFRWL |   |   |   |   |     |
| 10 | SRR1333837-38  | 100.0% | 97.2%  | SWVQSSAWDNLANFALLTCSARPSLEYGFCYSSYKLLSIWIVRTLRSISAYHTGSLTIPILHHLSPYQLCYRTHTFRWL |   |   |   |   |     |
| 11 | DRR241076      | 100.0% | 98.5%  | SWVQSSAWDNLANFALLTCSARPSLEYGFCYSSYKLLSIWIVRTLRSISAYHTGSLTIPILHHLSPYQLCYRTHTFRWL |   |   |   |   |     |
| 12 | SRR17258733    | 100.0% | 97.3%  | SWVQSSAWDNLANFALLTCSARPSLEYGFCYSSYKLLSIWIVRTLRSISAYHTGSLTIPILHHLSPYQLCYRTHTFRWL |   |   |   |   |     |
| 13 | SRR24542361    | 100.0% | 96.1%  | SWVQSSAWDNLANFALLTCSARPSLEYGFCYNSYKLLSIWIVRTLRSISAYHTGSLTIPILHHLSPYQLCYRTHTFRWL |   |   |   |   |     |
| 14 | SRR17258732    | 100.0% | 95.7%  | SWVQSSAWDNLANFALLTCSARPSLEYGFCYNSYKLLSIWIVRTLRSISAYHTGSLTIPILHHLSPYQLCYRTHTFRWL |   |   |   |   |     |
| 15 | SRR9685281     | 100.0% | 97.2%  | SWVQSSAWDNLANFALLTCSARPSLEYGFCYSSYKLLSIWIVRTLRSISAYHTGSLTIPILHHLSPYQLCYRTHTFRWL |   |   |   |   |     |
| 16 | DRR035925      | 100.0% | 99.9%  | SWVQSSAWDNLANFALLTCSARPSLEYGFCYSSYKLLSIWIVRTLRSISAYHTGSLTIPILHHLSPYQLCYRTHTFRWL |   |   |   |   |     |
| 17 | AB186123.1     | 99.9%  | 97.5%  | SWVQSSAWDNLANFALLTCSARPSLEYGFCYSSYKLLSIWIVRTLRSISAYHTGSLTIPILHHLSPYQLCYRTHTFRWL |   |   |   |   |     |
| 18 | KJ433990       | 100.0% | 97.5%  | SWVQSSAWDNLANFALLTCSARPSLEYGFCYSSYKLLSIWIVRTLRSISAYHTGSLTIPILHHLSPYQLCYRTHTFRWL |   |   |   |   |     |
| 19 | AB624361.1     | 100.0% | 97.3%  | SWVQSSAWDNLANFALLTCSARPSLEYGFCYSSYKLLSIWIVRTLRSISAYHTGSLTIPILHHLSPYQLCYRTHTFRWL |   |   |   |   |     |
|    | consensus/100% |        |        | SWVQSSAWDNLANFALLTCSARPSLEYGFCYSSYKLLSIWIMRTLRSISAYHTGSLTIPILHHLSPYQLCYRTHTFRWL |   |   |   |   |     |
|    | consensus/90%  |        |        | SWVQSSAWDNLANFALLTCSARPSLEYGFCYSSYKLLSIWIMRTLRSISAYHTGSLTIPILHHLSPYQLCYRTHTFRWL |   |   |   |   |     |
|    | consensus/80%  |        |        | SWVQSSAWDNLANFALLTCSARPSLEYGFCYSSYKLLSIWIVRTLRSISAYHTGSLTIPILHHLSPYQLCYRTHTFRWL |   |   |   |   |     |
|    | consensus/70%  |        |        | SWVQSSAWDNLANFALLTCSARPSLEYGFCYSSYKLLSIWIVRTLRSISAYHTGSLTIPILHHLSPYQLCYRTHTFRWL |   |   |   |   |     |

|   |           |        |        |                                                                                    |   |   |   |     |
|---|-----------|--------|--------|------------------------------------------------------------------------------------|---|---|---|-----|
|   | cov       | pid    | 401    | .                                                                                  | : | . | . | 480 |
| 1 | DRR068690 | 100.0% | 100.0% | PTHLDHFHKTLP SLIHRFA SITGRYLTNSPEFPSTSTFSINHLLQPECKSLQKFPHSLVIOENPTSFIVRCSTLLERRWL |   |   |   |     |
| 2 | DRR068691 | 100.0% | 96.8%  | PTHLDHFHKTLP SLIHRFA SITGRYLTNSPEFPSTSTFSINHLLQPECKSLQKFPHSLVIRENPASFIVRCSTLLORRWL |   |   |   |     |



|    |                |        |        |                                                                                     |
|----|----------------|--------|--------|-------------------------------------------------------------------------------------|
| 3  | DRR006265      | 100.0% | 97.2%  | PTHLDHFHKTLP SLIHRAEASITGRYLTNSPEFPTSTFSINHLLQPEGKSLQKFPEHSLVIRPNPASFIIVRCSTLLQKRWL |
| 4  | DRR039989      | 99.9%  | 97.1%  | PTHLDHFHKTLP SLIHRAEASITGRYLTNSPEFPTSTFSINHLLQPEGKSLQKFPEHSLVIRPNPASFIIVRCSTLLQKRWL |
| 5  | DRR079253      | 99.9%  | 97.2%  | PTHLDHFHKTLP SLIHRAEASITGRYLTNSPEFPTSTFSINHLLQPEGKSLQKFPEHSLVIRPNPASFIIVRCSTLLQKRWL |
| 6  | SRR6324419-24  | 100.0% | 95.4%  | PTHLDHFHKTLP SLIHRAEASITGRYLTNSPEFPTSTFSINHLLQPEGKSSQKFPEHSLVIRPNPASFIIVRCSTLLQRRWL |
| 7  | SRR11781560-1  | 100.0% | 95.5%  | PTHLDHFHKTLP SLIHRAEASITGRYLTNSPEFPTSTFSINHLLQPEGKSLQKFPEHSLVIRPNPASFIIVRCSTLLQRRWL |
| 8  | SRR5458683     | 100.0% | 97.2%  | PTHLDHFHKTLP SLIHRAEASITGRYLTNSPEFPTSTFSINHLLQPEGKSLQKFPEHSLVIRPNPASFIIVRCSTLLQKRWL |
| 9  | DRR023337+40   | 100.0% | 97.1%  | PTHLDHFHKTLP SLIHRAEASITGRYLTNSPEFPTSTFSINHLLQPEGKSLQKFPEHSLVIRPNPASFIIVRCSTLLQKRWL |
| 10 | SRR1333837-38  | 100.0% | 97.2%  | PTHLDHFHKTLP SLIHRAEASITGRYLTNSPEFPTSTFSINHLLQPEGKSLQKFPEHSLVIRPNPASFIIVRCSTLLQKRWL |
| 11 | DRR241076      | 100.0% | 98.5%  | PTHLDHFHKTLP SLIHRAEASITGRYLTNSPEFPTSTFSINHLLQPEGKSLQKFPEHSLVIRPNPASFIIVRCSTLLQKRWL |
| 12 | SRR17258733    | 100.0% | 97.3%  | PTHLDHFHKTLP SLIHRAEASITGRYLTNSPEFPTSTFSINHLLQPEGKSLQKFPEHSLVIRPNPASFIIVRCSTLLQKRWL |
| 13 | SRR24542361    | 100.0% | 96.1%  | PTHLDHFHKTLP SLIHRAEASITGRYLTNSPEFPTSTFSINHLLQPEGKSLQKFPEHSLVIRPNPASFIIVRCSTLLQRRWL |
| 14 | SRR17258732    | 100.0% | 95.7%  | PTHLDHFHKTLP SLIHRAEASITGRYLTNSPEFPTSTFSINHLLQPEGKSLQKFPEHSLVIRPNPASFIIVRCSTLLQRRWL |
| 15 | SRR9685281     | 100.0% | 97.2%  | PTHLDHFHKTLP SLIHRAEASITGRYLTNSPEFPTSTFSINHLLQPEGKSLQKFPEHSLVIRPNPASFIIVRCSTLLQKRWL |
| 16 | DRR035925      | 100.0% | 99.9%  | PTHLDHFHKTLP SLIHRAEASITGRYLTNSPEFPTSTFSINHLLQPEGKSLQKFPEHSLVIRPNPASFIIVRCSTLLQRRWL |
| 17 | AB186123.1     | 99.9%  | 97.5%  | PTHLDHFHKTLP SLIHRAEASITGRYLTNSPEFPTSTFSINHLLQPEGKSLQKFPEHSLVIRPNPASFIIVRCSTLLQRRWL |
| 18 | KJ433990       | 100.0% | 97.5%  | PTHLDHFHKTLP SLIHRAEASITGRYLTNSPEFPTSTFSINHLLQPEGKSLQKFPEHSLVIRPNPASFIIVRCSTLLQRRWL |
| 19 | AB624361.1     | 100.0% | 97.3%  | PTHLDHFHKTLP SLIHRAEASITGRYLTNSPEFPTSTFSINHLLQPEGKSLQKFPEHSLVIRPNPASFIIVRCSTLLQRRWL |
|    | consensus/100% |        |        | PTHLDHFHKTLP SLIHRAEASITGRYLTNSPEFPTSTFSINHLLQPEGKSLQKFPEHSLVIRPNPASFIIVRCSTLLQRRWL |
|    | consensus/90%  |        |        | PTHLDHFHKTLP SLIHRAEASITGRYLTNSPEFPTSTFSINHLLQPEGKSLQKFPEHSLVIRPNPASFIIVRCSTLLQRRWL |
|    | consensus/80%  |        |        | PTHLDHFHKTLP SLIHRAEASITGRYLTNSPEFPTSTFSINHLLQPEGKSLQKFPEHSLVIRPNPASFIIVRCSTLLQRRWL |
|    | consensus/70%  |        |        | PTHLDHFHKTLP SLIHRAEASITGRYLTNSPEFPTSTFSINHLLQPEGKSLQKFPEHSLVIRPNPASFIIVRCSTLLQRRWL |
|    |                | cov    | pid    |                                                                                     |
|    |                |        | 481    | 5                                                                                   |
| 1  | DRR068690      | 100.0% | 100.0% | LLGLSALTGVWYYHRRGNSPQEKSDAYLSYFHPDEWRLTIRTSNVMAIPHSFFEDSGYSAPSSPPSPDPPIVIEQPS       |
| 2  | DRR068691      | 100.0% | 96.8%  | LLGLSALTGVWYYHRRGNSPQEKSDAYLSYFHPDEWRLTIRTSNVTAIPHSFFEDSGYSTPSSRPPSPDPPIVIEQPS      |
| 3  | DRR006265      | 100.0% | 97.2%  | LLGLSALTGVWYYHRRGNSPQEKSDAYLSYFHPDEWRLTIRTSNVTAIPHSFFEDSGYSTPSSRPPSPDPPIVIEQPS      |
| 4  | DRR039989      | 99.9%  | 97.1%  | LLGLSALTGVWYYHRRGNSPQEKSDAYLSYFHPDEWRLTIRTSNVTAIPHSFFEDSGYSTPSSRPPSPDPPIVIEQPS      |
| 5  | DRR079253      | 99.9%  | 97.2%  | LLGLSALTGVWYYHRRGNSPQEKSDAYLSYFHPDEWRLTIRTSNVTAIPHSFFEDSGYSTPSSRPPSPDPPIVIEQPS      |
| 6  | SRR6324419-24  | 100.0% | 95.4%  | LLGLSALTGVWYYHRRGNSPQEKSDAYLSYFHPDEWRLTIRTSNVTAIPHSFFEDSGYSTPSSRPPSPDPPIVIEQPS      |
| 7  | SRR11781560-1  | 100.0% | 95.5%  | LLGLSALTGVWYYHRRGNSPQEKSDAYLSYFHPDEWRLTIRTSNVTAIPHSFFEDSGYSTPSSRPPSPDPPIVIEQPS      |
| 8  | SRR5458683     | 100.0% | 97.2%  | LLGLSALTGVWYYHRRGNSPQEKSDAYLSYFHPDEWRLTIRTSNVTAIPHSFFEDSGYSTPSSRPPSPDPPIVIEQPS      |
| 9  | DRR023337+40   | 100.0% | 97.1%  | LLGLSALTGVWYYHRRGNSPQEKSDAYLSYFHPDEWRLTIRTSNVTAIPHSFFEDSGYSTPSSRPPSPDPPIVIEQPS      |
| 10 | SRR1333837-38  | 100.0% | 97.2%  | LLGLSALTGVWYYHRRGNSPQEKSDAYLSYFHPDEWRLTIRTSNVTAIPHSFFEDSGYSTPSSRPPSPDPPIVIEQPS      |
| 11 | DRR241076      | 100.0% | 98.5%  | LLGLSALTGVWYYHRRGNSPQEKSDAYLSYFHPDEWRLTIRTSNVTAIPHSFFEDSGYSAPSSPPSPDPPIVIEQPS       |
| 12 | SRR17258733    | 100.0% | 97.3%  | LLGLSALTGVWYYHRRGNSPQEKSDAYLSYFHPDEWRLTIRTSNVTAIPHSFFEDSGYSTPSSRPPSPDPPIVIEQPS      |
| 13 | SRR24542361    | 100.0% | 96.1%  | LLGLSALTGVWYYHRRGNSPQEKSDAYLSYFHPDEWRLTIRTSNVMAIPHSFFEDSGYSTPSSRPPSPDPPIVIEQPS      |
| 14 | SRR17258732    | 100.0% | 95.7%  | LLGLSALTGVWYYHRRGNSPQEKSDAYLSYFHPDEWRLTIRTSNVMAIPHSFFEDSGYSTPSSRPPSPDPPIVIEQPS      |
| 15 | SRR9685281     | 100.0% | 97.2%  | LLGLSALTGVWYYHRRGNSPQEKSDAYLSYFHPDEWRLTIRTSNVTAIPHSFFEDSGYSTPSSRPPSPDPPIVIEQPS      |
| 16 | DRR035925      | 100.0% | 99.9%  | LLGLSALTGVWYYHRRGNSPQEKSDAYLSYFHPDEWRLTIRTSNVMAIPHSFFEDSGYSAPSSPPSPDPPIVIEQPS       |
| 17 | AB186123.1     | 99.9%  | 97.5%  | LLGLSALTGVWYYHRRGNSPQEKSDAYLSYFHPDEWRLTIRTSNVMAIPHSFFEDSGYSTPSSRPPSPDPPIVIEQPS      |
| 18 | KJ433990       | 100.0% | 97.5%  | LLGLSALTGVWYYHRRGNSPQEKSDAYLSYFHPDEWRLTIRTSNVMAIPHSFFEDSGYSTPSSRPPSPDPPIVIEQPS      |
| 19 | AB624361.1     | 100.0% | 97.3%  | LLGLSALTGVWYYHRRGNSPQEKSDAYLSYFHPDEWRLTIRTSNVMAIPHSFFEDSGYSAPSSPPSPDPPIVIEQPS       |
|    | consensus/100% |        |        | LLGLSALTGVWYYHRRGNSPQEKSDAYLSYFHPDEWRLTIRTSNVMAIPHSFFEDSGYSAPSSPPSPDPPIVIEQPS       |
|    | consensus/90%  |        |        | LLGLSALTGVWYYHRRGNSPQEKSDAYLSYFHPDEWRLTIRTSNVMAIPHSFFEDSGYSAPSSPPSPDPPIVIEQPS       |

consensus/80%  
consensus/70%

LLGLSALTGVWAYYHRRUNSPQEKSDAYLSYFHPDEWRLTIRTSNVHAIPHSEFFDSGYSSPSPPSPPPSPPIVICOPS  
LLGLSALTGVWAYYHRRUNSPQEKSDAYLSYFHPDEWRLTIRTSNVHAIPHSEFFDSGYSTPSPPSPPPSPPIVICOPS

|                  | cov    | pid    | 561                              | 6                                                 | 640         |
|------------------|--------|--------|----------------------------------|---------------------------------------------------|-------------|
| 1 DRR068690      | 100.0% | 100.0% | SNVSKHHQVQNQAYLTPAHPETPPSPGKQEI  | ESGETLATGFPNVATISGPSKASKDAPPTPLSSDETAHGPILPHKELF  |             |
| 2 DRR068691      | 100.0% | 96.8%  | ANVSKHHQVQNQAHLTPAHSETPPSPTKQEI  | IKSGETLATGFPNVATISGPSEASKDTPPTPLSSDETAHGPILPHKELF |             |
| 3 DRR006265      | 100.0% | 97.2%  | SNVSKHHQVQNQAYLTPAHPETPPSPSKQEI  | IKSGETLATGFPNVATISGPSEASKDAPPTPLNSDETAHGPILPHKELF |             |
| 4 DRR039989      | 99.9%  | 97.1%  | SNVSKHHQVQNQAYLTPAHPETPPSPSKQEI  | IKSGETLATGFPNVATISGPSEASKDAPPTPLNSDETAHGPILPHKELF |             |
| 5 DRR079253      | 99.9%  | 97.2%  | SNVSKHHQVQNQAYLTPAHPETPPSPSKQEI  | IKSGETLATGFPNVATISGPSEASKDAPPTPLNSDETAHGPILPHKELF |             |
| 6 SRR6324419-24  | 100.0% | 95.4%  | SDVSKHHQVQNQAYLTPAHPETPPSPTKQEI  | IKSGETLATGFPNVATISGPSEASKDAPPTPLSSDSTA            | HGPILPHKELF |
| 7 SRR11781560-1  | 100.0% | 95.5%  | SDVSKHHQVQNQAYLTPAHPETPPSPTKQEI  | IKSGETLATGFPNVATISGPSEASKDAPPTPLSSDSTA            | HGPILPHKELF |
| 8 SRR5458683     | 100.0% | 97.2%  | SNVSKHHQVQNQAYLTPAHPETPPSPSKQEI  | IKSGETLATGFPNVATISGPSEASKDAPPTPLNSDETAHGPILPHKELF |             |
| 9 DRR023337+40   | 100.0% | 97.1%  | SNVSKHHQVQNQAYLTPAHPETPPSPSKQEI  | IKSGETLATGFPNVATISGPSEASKDAPPTPLNSDETAHGPILPHKELF |             |
| 10 SRR1333837-38 | 100.0% | 97.2%  | SNVSKHHQVQNQAYLTPAHPETPPSPSKQEI  | IKSGETLATGFPNVATISGPSEASKDAPPTPLNSDETAHGPILPHKELF |             |
| 11 DRR241076     | 100.0% | 98.5%  | SNVSKHHQVQNQAYLTPAHPETPPCPSKQKIE | SGETLATGFPNVATISGPSEASKDAPPTPLSSDETAHGPILPHELF    |             |
| 12 SRR17258733   | 100.0% | 97.3%  | SNVSKHHQVQNQAYLTPAHPETPPSPSKQEI  | IKSGETLATGFPNVATISGPSEASKDAPPTPLNSDETAHGPILPHKELF |             |
| 13 SRR24542361   | 100.0% | 96.1%  | SNVSKHHQVQNQAYLTPAHPETPPSPSKQEI  | IKSGETLATGFPNVATISGPSEASKDAPPTPLSSDETAHGPILPHKELF |             |
| 14 SRR17258732   | 100.0% | 95.7%  | SNVSKHHQVQNQAYLTPAHPETPPSPSKQEI  | IKSGETLATGFPNVATISGPSEASKDAPPTPLSSDETAHGPILPHKELF |             |
| 15 SRR9685281    | 100.0% | 97.2%  | SNVSKHHQVQNQAYLTPAHPETPPSPSKQEI  | IKSGETLATGFPNVATISGPSEASKDAPPTPLNSDETAHGPILPHKELF |             |
| 16 DRR035925     | 100.0% | 99.9%  | SNVSKHHQVQNQAYLTPAHPETPPSPGKQEI  | ESGETLATGFPNVATISGPSKASKDAPPTPLSSDETAHGPILPHKELF  |             |
| 17 AB186123.1    | 99.9%  | 97.5%  | SNVSKHHQVQNQAYLTPAHPETPPSPSKQEI  | IKSGETLATGFPNVATISGPSEASKDAPPTPLSSDETAHGPILPHKELF |             |
| 18 KJ433990      | 100.0% | 97.5%  | SNVSKHHQVQNQAHLTPAHPETPPSPSKQEI  | IKSGETLATGFPNVATISGPSEASKDAPPTPLSSDETAHGPILPHKELF |             |
| 19 AB624361.1    | 100.0% | 97.3%  | SNVSKHHQVQNQAYLTPAHPETPPSPSKQEI  | IKSGETLATGFPNVATISGPSEASKDAPPTPLSSDETAHGPILPHKELF |             |
| consensus/100%   |        |        | usVSKHHQVQNQAaLTPAHSETPPSPSKQcIc | SGETLATGFPNVATISGPSKASKDAPPTPLSSDSTA              | HGPILPHELF  |
| consensus/90%    |        |        | ssVSKHHQVQNQAaLTPAHETPPSPSKQEIc  | SGETLATGFPNVATISGPSKASKDAPPTPLSSDSTA              | HGPILPHKELF |
| consensus/80%    |        |        | SNVSKHHQVQNQAYLTPAHPETPPSPKQEI   | IKSGETLATGFPNVATISGPSEASKDAPPTPLSDETAHGPILPHKELF  |             |
| consensus/70%    |        |        | SNVSKHHQVQNQAYLTPAHPETPPSPKQEI   | IKSGETLATGFPNVATISGPSEASKDAPPTPLSDETAHGPILPHKELF  |             |

consensus/80%  
consensus/70%

GISSPDHECTFLNRKRINVSTLPFPAPCELLVAFQAASNSTPQRVWAHLCTLFDPSSLDGPLERSQCFSSSEHDEALAWSL  
GISSPDHECTFLNRKRINVSTLPFPAPCELLVAFQAASNSTPQRVWAHLCTLFDPSSLDGPLERSQCFSSSEHDEALAWSL

|                  | cov    | pid    | 641                                                                               | 7 | 720 |
|------------------|--------|--------|-----------------------------------------------------------------------------------|---|-----|
| 1 DRR068690      | 100.0% | 100.0% | GISSPDHECTFLNRKRINVSTLPFPAPCELLVAFQAASNSTPQRVWAHLCTLFDPSSLDGPLERSQCFSSSEHDEALAWSL |   |     |
| 2 DRR068691      | 100.0% | 96.8%  | GISSPDHECTFLNRKRINVSTLPFPAPCELLVAFQAASNSTPQRVWAHLCTLFDPSSLDGPLERSQCFSSSEHDEALAWSL |   |     |
| 3 DRR006265      | 100.0% | 97.2%  | GISSPDHECTFLNRKRINVSTLPFPAPCELLVAFQAASNSTPQRVWDHLCTLFDPSSLDGPLERSQCFSSSEHDEALAWSL |   |     |
| 4 DRR039989      | 99.9%  | 97.1%  | GISSPDHECTFLNRKRINVSTLPFPAPCELLVAFQAASNSTPQRVWDHLCTLFDPSSLDGPLERSQCFSSSEHDEALAWSL |   |     |
| 5 DRR079253      | 99.9%  | 97.2%  | GISSPDHECTFLNRKRINVSTLPFPAPCELLVAFQAASNSTPQRVWDHLCTLFDPSSLDGPLERSQCFSSSEHDEALAWSL |   |     |
| 6 SRR6324419-24  | 100.0% | 95.4%  | GISSPDHECTFLQGRINVSKLPFPAPCELLVAFQAASNSTPQRVWAHLCTLFDPSSLDGPLERSQCFSSSEHDEALAWSL  |   |     |
| 7 SRR11781560-1  | 100.0% | 95.5%  | GISSPDHECTFLQVGRINVSKLPFPAPCELLVAFQAASNSTPQRVWAHLCTLFDPSSLDGPLERSQCFSSSEHDEALAWSL |   |     |
| 8 SRR5458683     | 100.0% | 97.2%  | GISSPDHECTFLNRKRINVSTLPFPAPCELLVAFQAASNSTPQRVWDHLCTLFDPSSLDGPLERSQCFSSSEHDEALAWSL |   |     |
| 9 DRR023337+40   | 100.0% | 97.1%  | GISSPDHECTFLNRKRINVSTLPFPAPCELLVAFQAASNSTPQRVWDHLCTLFDPSSLDGPLERSQCFSSSEHDEALAWSL |   |     |
| 10 SRR1333837-38 | 100.0% | 97.2%  | GISSPDHECTFLNRKRINVSTLPFPAPCELLVAFQAASNSTPQRVWDHLCTLFDPSSLDGPLERSQCFSSSEHDEALAWSL |   |     |
| 11 DRR241076     | 100.0% | 98.5%  | GISSPDHECTFLNRKRINVSTLPFPAPCELLVAFQAASNSTPQRVWAHLCTLFDPSSLDGPLERSQCFSSSEHDEALAWSL |   |     |
| 12 SRR17258733   | 100.0% | 97.3%  | GISSPDHECTFLNRKRINVSTLPFPAPCELLVAFQAASNSTPQRVWDHLCTLFDPSSLDGPLERSQCFSSSEHDEALAWSL |   |     |
| 13 SRR24542361   | 100.0% | 96.1%  | GISSPDHECTFLNRKRINVSTLPFPAPCELLVAFQAASNSTPQRVWAHLCTLFDPSSLDGPLERSQCFSSSEHDEALAWSL |   |     |
| 14 SRR17258732   | 100.0% | 95.7%  | GISSPDHECTFLNRKRINVSTLPFPAPCELLVAFQAASNSTPQRVWAHLCTLFDPSSLDGPLERSQCFSSSEHDEALAWSL |   |     |
| 15 SRR9685281    | 100.0% | 97.2%  | GISSPDHECTFLNRKRINVSTLPFPAPCELLVAFQAASNSTPQRVWDHLCTLFDPSSLDGPLERSQCFSSSEHDEALAWSL |   |     |





|                |               |        |        |                                                                                         |                                     |
|----------------|---------------|--------|--------|-----------------------------------------------------------------------------------------|-------------------------------------|
| 10             | SRR1333837-38 | 100.0% | 97.2%  | HEYKLCPRAKNLASNMKNETDGVIOSSLRTASSDPTFFHRLDQRA                                           | DFAPQVSVOLIHITGFPGCGKTFPVTQLIKTKAF  |
| 11             | DRR241076     | 100.0% | 98.5%  | HEYTLCKPRAKNLASNMKNETDGVIOSTLRTASSDPTFFHRLDQRA                                          | DFAPQVSVOLIHITGFPGCGKTFPVTQLIKTKAF  |
| 12             | SRR17258733   | 100.0% | 97.3%  | HEYKLCPRAKNLASNMKNETDGVIOSSLRTASSDPTFFHRLDQRA                                           | DFAPQVSVOLIHITGFPGCGKTFPVTQLIKTKAF  |
| 13             | SRR24542361   | 100.0% | 96.1%  | HEYKLCPRAKNLASNMKNETDGVIOSSLRAASSDPTFFHRLDQRA                                           | DFAPQVSVOLIHITGFPGCGKTFPVTQLIKTKAF  |
| 14             | SRR17258732   | 100.0% | 95.7%  | HEYKLCPRAKNLASNMKNETDGVIOSSLRAASSDPTFFHRLDQRA                                           | DFAPQVSVOLIHITGFPGCGKTFPVTQLIKTKAF  |
| 15             | SRR9685281    | 100.0% | 97.2%  | HEYKLCPRAKNLASNMKNETDGVIOSSLRTASSDPTFFHRLDQRA                                           | DFAPQVSVOLIHITGFPGCGKTFPVTQLIKTKAF  |
| 16             | DRR035925     | 100.0% | 99.9%  | HEYTLCKPRAKNLASNMKNETDGVIOSTLRTASSDPTFFHRLDQRA                                          | DFPQVSVOLIHIAFGPGCGKTFPVTQLIKTKAF   |
| 17             | AB186123.1    | 99.9%  | 97.5%  | HEYKLCPRAK-IWPHENETDGVIOSSLRAASSDPTFFHRLDQRA                                            | DFAPQVSVOLIHITGFPGCGKTFPVTQLIKTKAF  |
| 18             | KJ433990      | 100.0% | 97.5%  | HEYKLCPRAKNLASNMKNETDGVIOSSLRAASSDPTFFHRLDQRA                                           | DFAPRVSVOLIHITGFPGCGKTFPVTQLIKTKAF  |
| 19             | AB624361.1    | 100.0% | 97.3%  | HEYTLCKPRAKNLASNMKNETDGVIOSTLRAASSDPTFFHRLDQRA                                          | DFAPQVSVOLIHITGFPGCGKTFPVTQLIKTKAF  |
| consensus/100% |               |        |        | HEYpLCPRAKl <sup>l</sup> hsph.NETDGVIOSSlRsASSDPTFFHRLDQRA                              | dh...pVSVOLIHIsGFPGCGKTFPVTQLIKTKuh |
| consensus/90%  |               |        |        | HEYpLCPRAKNLASNM <sup>c</sup> NETDGVIOSSlRsASSDPTFFHRLDQRA                              | dh...QVSVOLIHIsGFPGCGKTFPVTQLIKTKuh |
| consensus/80%  |               |        |        | HEYpLCPRAKNLASNMKNETDGVIOSSoLrsASSDPTFFHRLDQRA                                          | DFsPQVSVOLIHITGFPGCGKTFPVTQLIKTKAF  |
| consensus/70%  |               |        |        | HEYKLCPRAKNLASNMKNETDGVIOSoLrsASSDPTFFHRLDQRA                                           | DFAPQVSVOLIHITGFPGCGKTFPVTQLIKTKAF  |
| cov            |               |        |        | pid                                                                                     | 881 . 9 . : . 960                   |
| 1              | DRR068690     | 100.0% | 100.0% | KCQYRVAVPTTELSEWKDHMKLPSSSEVWRVSTWETSLMKSAPVLVIDEVYKMERGFLDLALVADPALQFVILLGDFCQT        |                                     |
| 2              | DRR068691     | 100.0% | 96.8%  | KCQYRVAVPTTELSEWKDHMKLPSSDVWRVSTWETSLMKSAPVLVIDEVYKMERGFLDLALVADPALQFVILLGDFCQT         |                                     |
| 3              | DRR006265     | 100.0% | 97.2%  | KCQYRVAVPTTELSEWKDHMKLPSSDAWRVSTWETSLMKSAPVLVIDEVYKMERGFLDLALVADPALQFVILLGDFCQT         |                                     |
| 4              | DRR039989     | 99.9%  | 97.1%  | KCQYRVAVPTTELSEWKDHMKLPSSDAWRVSTWETSLMKSAPVLVIDEVYKMERGFLDLALVADPALQFVILLGDFCQT         |                                     |
| 5              | DRR079253     | 99.9%  | 97.2%  | KCQYRVAVPTTELSEWKDHMKLPSSDAWRVSTWETSLMKSAPVLVIDEVYKMERGFLDLALVADPALQFVILLGDFCQT         |                                     |
| 6              | SRR6324419-24 | 100.0% | 95.4%  | KEQYRVITVPTTELSEWKDHMKLPSSDAWRVSTWETSLMKSAPVLVIDEVYKMERGFLDLALVADPALQFVILLGDFCQT        |                                     |
| 7              | SRR11781560-1 | 100.0% | 95.5%  | KEQYRVITVPTTELSEWKDHMKLPSSDAWRVSTWETSLMKSAPVLVIDEVYKMERGFLDLALVADPALQFVILLGDFCQT        |                                     |
| 8              | SRR5458683    | 100.0% | 97.2%  | KCQYRVAVPTTELSEWKDHMKLPSSDAWRVSTWETSLMKSAPVLVIDEVYKMERGFLDLALVADPALQFVILLGDFCQT         |                                     |
| 9              | DRR023337+40  | 100.0% | 97.1%  | KCQYRVAVPTTELSEWKDHMKLPSSDAWRVSTWETSLMKSAPVLVIDEVYKMERGFLDLALVADPALQFVILLGDFCQT         |                                     |
| 10             | SRR1333837-38 | 100.0% | 97.2%  | KCQYRVAVPTTELSEWKDHMKLPSSDAWRVSTWETSLMKSAPVLVIDEVYKMERGFLDLALVADPALQFVILLGDFCQT         |                                     |
| 11             | DRR241076     | 100.0% | 98.5%  | KCQYRVAVPTTELSEWKDHMKLPSSSEVWRVSTWETSLMKSAPVLVIDEVYKMERGFLDLALVADPALQFVILLGDFCQT        |                                     |
| 12             | SRR17258733   | 100.0% | 97.3%  | KCQYRVAVPTTELSEWKDHMKLPSSDAWRVSTWETSLMKSAPVLVIDEVYKMERGFLDLALVADPALQFVILLGDFCQT         |                                     |
| 13             | SRR24542361   | 100.0% | 96.1%  | KSQYRVAVPTTELSEWKDHMKLPSSDAWRVSTWETSLMKSAPVLVIDEVYKMERGFLDLALVADPALQFVILLGDFCQT         |                                     |
| 14             | SRR17258732   | 100.0% | 95.7%  | KSQYRVAVPTTELSEWKDHMKLPSSDVWRVSTWETSLMKSAPVLVIDEVYKMERGFLDLALVADPALQFVILLGDFCQT         |                                     |
| 15             | SRR9685281    | 100.0% | 97.2%  | KCQYRVAVPTTELSEWKDHMKLPSSDAWRVSTWETSLMKSAPVLVIDEVYKMERGFLDLALVADPALQFVILLGDFCQT         |                                     |
| 16             | DRR035925     | 100.0% | 99.9%  | KCQYRVAVPTTELSEWKDHMKLPSSSEVWRVSTWETSLMKSAPVLVIDEVYKMERGFLDLALVADPALQFVILLGDFCQT        |                                     |
| 17             | AB186123.1    | 99.9%  | 97.5%  | KCQYRVAVPTTELSEWKDHMKLPSSDAWRVSTWETSLMKSAPVLVIDEVYKMERGFLDLALVADPALQFVILLGDFCQT         |                                     |
| 18             | KJ433990      | 100.0% | 97.5%  | KCQYRVAVPTTELSEWKDHMKLPSSDVWRVSTWETSLMKSAPVLVIDEVYKMERGFLDLALVADPALQFVILLGDFCQT         |                                     |
| 19             | AB624361.1    | 100.0% | 97.3%  | KCQYRVAVPTTELSEWKDHMKLPSSSEVWRVSTWETSLMKSAPVLVIDEVYKMERGFLDLALVADPALQFVILLGDFCQT        |                                     |
| consensus/100% |               |        |        | KtQYRVsVPTTELSEWKDHMKLP <u>s</u> -sWRVSTWETSLMKSAPVLVIDEVYKMERGFLDLslADPALQFVILLGDFCQT  |                                     |
| consensus/90%  |               |        |        | KtQYRVsVPTTELSEWKDHMKLP <u>s</u> -sWRVSTWETSLMKSAPVLVIDEVYKMERGFLDLALVADPALQFVILLGDFCQT |                                     |
| consensus/80%  |               |        |        | KtQYRVAVPTTELSEWKDHMKLPSS-sWRVSTWETSLMKSAPVLVIDEVYKMERGFLDLALVADPALQFVILLGDFCQT         |                                     |
| consensus/70%  |               |        |        | KCQYRVAVPTTELSEWKDHMKLPSSsWRVSTWETSLMKSAPVLVIDEVYKMERGFLDLALVADPALQFVILLGDFCQT          |                                     |
| cov            |               |        |        | pid                                                                                     | 961 . 0 . . 1040                    |
| 1              | DRR068690     | 100.0% | 100.0% | VYSSVNPSSNYRLISEVEHLKPYRDFYCHWTHRLPRLARFFGVSTTNPOEGFICRRDNPHKSYPILTSSQQTARVCAG          |                                     |
| 2              | DRR068691     | 100.0% | 96.8%  | VYSSVNPSSNYRLISEVEHLKPYRDFYCHWTHRLPRLARFFGVSTTNPOEGFICRRDNPHKSYPILTSSQQTARVCAG          |                                     |
| 3              | DRR006265     | 100.0% | 97.2%  | VYSSVNPSSNYRLISEVEHLKPYRDFYCHWTHRLPRLARFFGVSTTNPOEGFICRRDNPHKSYPILTSSQQTARVCAG          |                                     |

|    |                |        |       |         |          |               |          |              |         |           |           |        |
|----|----------------|--------|-------|---------|----------|---------------|----------|--------------|---------|-----------|-----------|--------|
| 4  | DRR039989      | 99.9%  | 97.1% | VYSSVNE | DSSNYRLI | SEVEHLKPYRDFY | CHWTHRLE | RLARFFGVSTTN | PQEGFIC | RRDNPHKSY | PILTSSQQT | ARVCAG |
| 5  | DRR079253      | 99.9%  | 97.2% | VYSSVNE | DSSNYRLI | SEVEHLKPYRDFY | CHWTHRLE | RLARFFGVSTTN | PQEGFIC | RRDNPHKSY | PILTSSQQT | ARVCAG |
| 6  | SRR6324419-24  | 100.0% | 95.4% | VYSSVNE | DSSNYRLI | SEVEHLKPYRDFY | CHWTHRLE | RLARFFGVSTTN | PQEGFIC | RRDNPHKSY | PILTSSQQT | ARVCAG |
| 7  | SRR11781560-1  | 100.0% | 95.5% | VYSSVNE | DSSNYRLI | SEVEHLKPYRDFY | CHWTHRLE | RLARFFGVSTTN | PQEGFIC | RRDNPHKSY | PILTSSQQT | ARVCAG |
| 8  | SRR5458683     | 100.0% | 97.2% | VYSSVNE | DSSNYRLI | SEVEHLKPYRDFY | CHWTHRLE | RLARFFGVSTTN | PQEGFIC | RRDNPHKSY | PILTSSQQT | ARVCAG |
| 9  | DRR023337+40   | 100.0% | 97.1% | VYSSVNE | DSSNYRLI | SEVEHLKPYRDFY | CHWTHRLE | RLARFFGVSTTN | PQEGFIC | RRDNPHKSY | PILTSSQQT | ARVCAG |
| 10 | SRR1333837-38  | 100.0% | 97.2% | VYSSVNE | DSSNYRLI | SEVEHLKPYRDFY | CHWTHRLE | RLARFFGVSTTN | PQEGFIC | RRDNPHKSY | PILTSSQQT | ARVCAG |
| 11 | DRR241076      | 100.0% | 98.5% | VYSSVNE | DSSNYRLI | SEVEHLKPYRDFY | CHWTHRLE | RLARFFGVSTTN | PQEGFIC | RRDNPHKSY | PILTSSQQT | ARVCAG |
| 12 | SRR17258733    | 100.0% | 97.3% | VYSSVNE | DSSNYRLI | SEVEHLKPYRDFY | CHWTHRLE | RLARFFGVSTTN | PQEGFIC | RRDNPHKSY | PILTSSQQT | ARVCAG |
| 13 | SRR24542361    | 100.0% | 96.1% | VYSSVNE | DSSNYRLI | SEVEHLKPYRDFY | CLWTHRLE | RLARFFGVSTTN | PQEGFIC | RRDNPHKSY | PILTSSQQT | ARVCAG |
| 14 | SRR17258732    | 100.0% | 95.7% | VYSSVNE | DSSNYRLI | SEVEHLKPYRDFY | CLWTHRLE | RLARFFGVSTTN | PQEGFIC | RRDNPHKSY | PILTSSQQT | ARVCAG |
| 15 | SRR9685281     | 100.0% | 97.2% | VYSSVNE | DSSNYRLI | SEVEHLKPYRDFY | CHWTHRLE | RLARFFGVSTTN | PQEGFIC | RRDNPHKSY | PILTSSQQT | ARVCAG |
| 16 | DRR035925      | 100.0% | 99.9% | VYSSVNE | DSSNYRLI | SEVEHLKPYRDFY | CHWTHRLE | RLARFFGVSTTN | PQEGFIC | RRDNPHKSY | PILTSSQQT | ARVCAG |
| 17 | AB186123.1     | 99.9%  | 97.5% | VYSSVNE | DSSNYRLI | SEVEHLKPYRDFY | CHWTHRLE | RLARFFGVSTTN | PQEGFIC | RRDNPHKSY | PILTSSQQT | ARVCAG |
| 18 | KJ433990       | 100.0% | 97.5% | VYSSVNE | DSSNYRLI | SEVEHLKPYRDFY | CHWTHRLE | RLARFFGVSTTN | PQEGFIC | RRDNPHKSY | PILTSSQQT | ARVCAG |
| 19 | AB624361.1     | 100.0% | 97.3% | VYSSVNE | DSSNYRLI | SEVEHLKPYRDFY | CHWTHRLE | RLARFFGVSTTN | PQEGFIC | RRDNPHKSY | PILTSSQQT | ARVCAG |
|    | consensus/100% |        |       | VYSSVNE | DSSNYRLI | SEVEHLKPYRDFY | CHWTHRLE | RLARFFGVSTTN | PQEGFIC | RRDNPHKSY | PILTSSQQT | ARVCAG |
|    | consensus/90%  |        |       | VYSSVNE | DSSNYRLI | SEVEHLKPYRDFY | CHWTHRLE | RLARFFGVSTTN | PQEGFIC | RRDNPHKSY | PILTSSQQT | ARVCAG |
|    | consensus/80%  |        |       | VYSSVNE | DSSNYRLI | SEVEHLKPYRDFY | CHWTHRLE | RLARFFGVSTTN | PQEGFIC | RRDNPHKSY | PILTSSQQT | ARVCAG |
|    | consensus/70%  |        |       | VYSSVNE | DSSNYRLI | SEVEHLKPYRDFY | CHWTHRLE | RLARFFGVSTTN | PQEGFIC | RRDNPHKSY | PILTSSQQT | ARVCAG |

|    |                |        |        |          |          |         |          |           |       |            |            |            |       |
|----|----------------|--------|--------|----------|----------|---------|----------|-----------|-------|------------|------------|------------|-------|
|    |                | cov    | pid    | 1041     | :        | .       | .        | .         | .     | 1          | .          | 1120       |       |
| 1  | DRR068690      | 100.0% | 100.0% | TGHRALTE | CSSQGSTF | QAPAQIF | VDSNVASV | HVSATLVAT | TRSRS | GVIFTGNHRL | FQSRPGTAPL | FEAMLNDQPF | NFLNT |
| 2  | DRR068691      | 100.0% | 96.8%  | TGHRALTE | CSSQGSTF | QAPAQIF | VDSNVASV | HVSATLVAT | TRSRS | GVIFTGNHRL | FQSRPGTAPL | FEAMLNDQPF | NFLNT |
| 3  | DRR006265      | 100.0% | 97.2%  | TGHRALTE | CSSQGSTF | QAPAQIF | VDSNVASV | HVSATLVAT | TRSRS | GVIFTGNHRL | FQSRPGTAPL | FEAMLNDQPF | SFLNT |
| 4  | DRR039989      | 99.9%  | 97.1%  | TGHRALTE | CSSQGSTF | QAPAQIF | VDSNVASV | HVSATLVAT | TRSRS | GVIFTGNHRL | FQSRPGTAPL | FEAMLNDQPF | SFLNT |
| 5  | DRR079253      | 99.9%  | 97.2%  | TGHRALTE | CSSQGSTF | QAPAQIF | VDSNVASV | HVSATLVAT | TRSRS | GVIFTGNHRL | FQSRPGTAPL | FEAMLNDQPF | SFLNT |
| 6  | SRR6324419-24  | 100.0% | 95.4%  | TGHRALTE | CSSQGSTF | QAPAQIF | VDSNVASV | HVSATLVAT | TRSRS | GVIFTGNHRL | FQSRPGTAPL | FEAMLNDQPF | NFLNT |
| 7  | SRR11781560-1  | 100.0% | 95.5%  | TGHRALTE | CSSQGSTF | QAPAQIF | VDSNVASV | HVSATLVAT | TRSRS | GVIFTGNHRL | FQSRPGTAPL | FEAMLNDQPF | NFLNT |
| 8  | SRR5458683     | 100.0% | 97.2%  | TGHRALTE | CSSQGSTF | QAPAQIF | VDSNVASV | HVSATLVAT | TRSRS | GVIFTGNHRL | FQSRPGTAPL | FEAMLNDQPF | SFLNT |
| 9  | DRR023337+40   | 100.0% | 97.1%  | TGHRALTE | CSSQGSTF | QAPAQIF | VDSNVASV | HVSATLVAT | TRSRS | GVIFTGNHRL | FQSRPGTAPL | FEAMLNDQPF | SFLNT |
| 10 | SRR1333837-38  | 100.0% | 97.2%  | TGHRALTE | CSSQGSTF | QAPAQIF | VDSNVASV | HVSATLVAT | TRSRS | GVIFTGNHRL | FQSRPGTAPL | FEAMLNDQPF | SFLNT |
| 11 | DRR241076      | 100.0% | 98.5%  | TGHRALTE | CSSQGSTF | QAPAQIF | VDSNVASV | HVSATLVAT | TRSRS | GVIFTGNHRL | FQSRPGTAPL | FEAMLNDQPF | NFLNT |
| 12 | SRR17258733    | 100.0% | 97.3%  | TGHRALTE | CSSQGSTF | QAPAQIF | VDSNVASV | HVSATLVAT | TRSRS | GVIFTGNHRL | FQSRPGTAPL | FEAMLNDQPF | SFLNT |
| 13 | SRR24542361    | 100.0% | 96.1%  | TGHRALTE | CSSQGSTF | QAPAQIF | VDSNVASV | HVSATLVAT | TRSRS | GVIFTGNHRL | FQSRPGTAPL | FEAMLNDQPF | NFLNT |
| 14 | SRR17258732    | 100.0% | 95.7%  | TGHRALTE | CSSQGSTF | QAPAQIF | VDSNVASV | HVSATLVAT | TRSRS | GVIFTGNHRL | FQSRPGTAPL | FEAMLNDQPF | NFLNT |
| 15 | SRR9685281     | 100.0% | 97.2%  | TGHRALTE | CSSQGSTF | QAPAQIF | VDSNVASV | HVSATLVAT | TRSRS | GVIFTGNHRL | FQSRPGTAPL | FEAMLNDQPF | SFLNT |
| 16 | DRR035925      | 100.0% | 99.9%  | TGHRALTE | CSSQGSTF | QAPAQIF | VDSNVASV | HVSATLVAT | TRSRS | GVIFTGNHRL | FQSRPGTAPL | FEAMLNDQPF | NFLNT |
| 17 | AB186123.1     | 99.9%  | 97.5%  | TGHRALTE | CSSQGSTF | QAPAQIF | VDSNVASV | HVSATLVAT | TRSRS | GVIFTGNHRL | FQSRPGTAPL | FEAMLNDQPF | NFLNT |
| 18 | KJ433990       | 100.0% | 97.5%  | TGHRALTE | CSSQGSTF | QAPAQIF | VDSNVASV | HVSATLVAT | TRSRS | GVIFTGNHRL | FQSRPGTAPL | FEAMLNDQPF | DFLNT |
| 19 | AB624361.1     | 100.0% | 97.3%  | TGHRALTE | CSSQGSTF | QAPAQIF | VDSNVASV | HVSATLVAT | TRSRS | GVIFTGNHRL | FQSRPGTAPL | FEAMLNDQPF | NFLNT |
|    | consensus/100% |        |        | TGHRALTE | CSSQGSTF | QAPAQIF | VDSNVASV | HVSATLVAT | TRSRS | GVIFTGNHRL | FQSRPGTAPL | FEAMLNDQPF | SFLNT |
|    | consensus/90%  |        |        | TGHRALTE | CSSQGSTF | QAPAQIF | VDSNVASV | HVSATLVAT | TRSRS | GVIFTGNHRL | FQSRPGTAPL | FEAMLNDQPF | SFLNT |
|    | consensus/80%  |        |        | TGHRALTE | CSSQGSTF | QAPAQIF | VDSNVASV | HVSATLVAT | TRSRS | GVIFTGNHRL | FQSRPGTAPL | FEAMLNDQPF | SFLNT |

|                |        |          |                                                                                    |
|----------------|--------|----------|------------------------------------------------------------------------------------|
| consensus/70%  |        |          | TGHRALTECSSQGSTFQAPAQIFVDSNVASVHVSATLVATTTRSRSGVIFTGNHRLFQSRPGTAPLFEAMLNDQPFSELNT  |
|                | cov    | pid 1121 | 2 1200                                                                             |
| 1              | 100.0% | 100.0%   | FANELGGMELITSPIKERKTIILRGGSYDFSAYRSYQKRHHMTNFKFDPAHIRAPRSTSAKPPPNANDTSDVIIIFAELEFD |
| 2              | 100.0% | 96.8%    | FANELGGMELIASPIKERKTIILRGGSYDFSAYRSYQKRHHMTNFKFDPAHIRAPRSTSAKPLPANDTSDVIIIFAELEFD  |
| 3              | 100.0% | 97.2%    | FANELGGMELITSPIKERKTIILRGGSYDFSAYRSYQKRHHMTNFKFDPAHIRAPRSTSAKPLPANDTSDIIIIIFAELEFD |
| 4              | 99.9%  | 97.1%    | FANELGGMELITSPIKERKTIILRGGSYDFSAYRSYQKRHHMTNFKFDPAHIRAPRSTSAKPLPANDTSDVIIIFAELEFD  |
| 5              | 99.9%  | 97.2%    | FANELGGMELITSPIKERKTIILRGGSYDFSAYRSYQKRHHMTNFKFDPAHIRAPRSTSAKPLPANDTSDIIIIIFAELEFD |
| 6              | 100.0% | 95.4%    | FANELRGMEPITSPIKERKTIILRGGSYDFSAYRSYQKRHHMTNFKFDPAHIRAPRSASAKPLPANDASDIIITFAELEFD  |
| 7              | 100.0% | 95.5%    | FANELRGMEPITSPIKERKTIILRGGSYDFSAYRRKLPKHHRTNFKFDPAHIRAPRSASAKPLPANDTSDVIIIFAELEFD  |
| 8              | 100.0% | 97.2%    | FANELGGMELITSPIKERKTIILRGGSYDFSAYRSYQKRHHMTNFKFDPAHIRAPRSTSAKPLPANDTSDIIIIIFAELEFD |
| 9              | 100.0% | 97.1%    | FANELGGMELITSPIKERKTIILRGGSYDFSAYRSYQKRHHMTNFKFDPAHIRAPRSTSAKPLPANDTSDIIIIIFAELEFD |
| 10             | 100.0% | 97.2%    | FANELGGMELITSPIKERKTIILRGGSYDFSAYRSYQKRHHMTNFKFDPAHIRAPRSTSAKPLPANDTSDIIIIIFAELEFD |
| 11             | 100.0% | 98.5%    | FANELGGMELITSPIKERKTIILRGGSYDFSAYRSYQKRHHMTNFKFDPAHIRAPRSTSAKPLPANDTSDVIIIFAELEFD  |
| 12             | 100.0% | 97.3%    | FANELGGMELITSPIKERKTIILRGGSYDFSAYRSYQKRHHMTNFKFDPAHIRAPRSTSAKPLPANDTSDIIIIIFAELEFD |
| 13             | 100.0% | 96.1%    | FANELGGMELITSPIKERKTIILRGGSYDFSAYRSHQKRHHMTNFKFDPAHIRAPRSTSAKPLPANDTSDIIIIIFAELEFD |
| 14             | 100.0% | 95.7%    | FANELGGMELITSPIKERKTIILRGGSYDFSAYRSHQKRHHMTNFKFDPAHIRAPRSTSAKPLPANDTSDIIIIIFAELEFD |
| 15             | 100.0% | 97.2%    | FANELGGMELITSPIKERKTIILRGGSYDFSAYRSYQKRHHMTNFKFDPAHIRAPRSTSAKPLPANDTSDIIIIIFAELEFD |
| 16             | 100.0% | 99.9%    | FANELGGMELITSPIKERKTIILRGGSYDFSAYRSYQKRHHMTNFKFDPAHIRAPRSTSAKPPPNANDTSDVIIIFAELEFD |
| 17             | 99.9%  | 97.5%    | FANELGGMELITSPIKERKTIILRGGSYDFSAYRSYQKRHHMTNFKFDPAHIRAPRSTSAKPLPANDTSDIIIIIFAELEFD |
| 18             | 100.0% | 97.5%    | FANELGGMELITSPIKERKTIILRGGSYDFSAYRSYQKRHHMTNFKFDPAHIRAPRSTSAKPLPANDTSDIIIIIFAELEFD |
| 19             | 100.0% | 97.3%    | FANELGGMELITSPIKERKTIILRGGSYDFSAYRSYQKRHHMTNFKFDPAHIRAPRSTSAKPLPANDTSDVIIIFAELEFD  |
| consensus/100% |        |          | FANELGMEIISSPIKERKTIILRGGSYDFSAAaRph...HHRhTNFKFDPAHhRAPHss.AKP.PANDSSDIIIfAELEFD  |
| consensus/90%  |        |          | FANELGMEIITSPIKERKTIILRGGSYDFSAAaRsaop+HHRMTNFKFDPAHhRAPRss.AKP.PANDTSDIIIfAELEFD  |
| consensus/80%  |        |          | FANELGGMELITSPIKERKTIILRGGSYDFSAAaRSYQKRHHMTNFKFDPAHIRAPRSTSAKPLPANDTSDIIIfAELEFD  |
| consensus/70%  |        |          | FANELGGMELITSPIKERKTIILRGGSYDFSAYRSYQKRHHMTNFKFDPAHIRAPRSTSAKPLPANDTSDIIIfAELEFD   |
|                | cov    | pid 1201 | 1280                                                                               |
| 1              | 100.0% | 100.0%   | LQSSAIFRLDTHHLPETRRPLHFDIPSSLPTKADISGAEPDTSIEPVYPGCDYKTVAALMMEPRDEDSLEIRHNGEFSN    |
| 2              | 100.0% | 96.8%    | LQSSAIFRLDTHHLPETRRPLHFDIPSSLPTKVDISSVEPTDTAIEPVYPGCDYKTVAALMMEPRDEDSLEIRHNGEFSN   |
| 3              | 100.0% | 97.2%    | LQSSAIFRLDTHHLPETRRPLHFDIPSSLPTKVDISSVEPTDTAIEPVYPGCDYKTVAALMMEPRDEDSLEIRHNGEFSN   |
| 4              | 99.9%  | 97.1%    | LQSSAIFRLDTHHLPETRRPLHFDIPSSLPTKVDISSVEPTDTAIEPVYPGCDYKTVAALMMEPRDEDSLEIRHNGEFSN   |
| 5              | 99.9%  | 97.2%    | LQSSAIFRLDTHHLPETRRPLHFDIPSSLPTKVDISSVEPTDTAIEPVYPGCDYKTVAALMMEPRDEDSLEIRHNGEFSN   |
| 6              | 100.0% | 95.4%    | LQSSAIFRLDTHHLPETRRPLHFDIPSSLPTKVDISSVEPTDTAIEPVYPGCDYKTVAALMMEPRDEDSLEIRHNGEFSN   |
| 7              | 100.0% | 95.5%    | LQSSAIFRLDTHHLPETRRPLHFDIPSSLPTKVDISSVEPTDTAIEPVYPGCDYKTVAALMMEPRDEDSLEIRHNGEFSN   |
| 8              | 100.0% | 97.2%    | LQSSAIFRLDTHHLPETRRPLHFDIPSSLPTKVDISSVEPTDTAIEPVYPGCDYKTVAALMMEPRDEDSLEIRHNGEFSN   |
| 9              | 100.0% | 97.1%    | LQSSAIFRLDTHHLPETRRPLHFDIPSSLPTKVDISSVEPTDTAIEPVYPGCDYKTVAALMMEPRDEDSLEIRHNGEFSN   |
| 10             | 100.0% | 97.2%    | LQSSAIFRLDTHHLPETRRPLHFDIPSSLPTKVDISSVEPTDTAIEPVYPGCDYKTVAALMMEPRDEDSLEIRHNGEFSN   |
| 11             | 100.0% | 98.5%    | LQSSAIFRLDTHHLPETRRPLHFDIPSSLPTKADISGAEPDTSIEPVYPGCDYKTVAALMMEPRDEDSLEIRHNGEFSN    |
| 12             | 100.0% | 97.3%    | LQSSAIFRLDTHHLPETRRPLHFDIPSSLPTKVDISSVEPTDTAIEPVYPGCDYKTVAALMMEPRDEDSLEIRHNGEFSN   |
| 13             | 100.0% | 96.1%    | LQSSAIFRLDTHHLPETRRPLHFDIPSSLPTKVDISSVESTDTAIEPVYPGCDYKTVAALMMDPRDEDSLEIRHNGEFSN   |
| 14             | 100.0% | 95.7%    | LQSSAIFRLDTHHLPETRRPLHFDIPSSLPTKVDISSVESTDTAIEPVYPGCDYKTVAALMMDPRDEDSLEIRHNGEFSN   |
| 15             | 100.0% | 97.2%    | LQSSAIFRLDTHHLPETRRPLHFDIPSSLPTKVDISSVEPTDTAIEPVYPGCDYKTVAALMMEPRDEDSLEIRHNGEFSN   |
| 16             | 100.0% | 99.9%    | LQSSAIFRLDTHHLPETRRPLHFDIPSSLPTKADISGAEPDTSIEPVYPGCDYKTVAALMMEPRDEDSLEIRHNGEFSN    |



|    |                |        |          |                                                                                    |
|----|----------------|--------|----------|------------------------------------------------------------------------------------|
| 17 | AB186123.1     | 99.9%  | 97.5%    | LQSSAIFRLDTHHLPETRRPLHFDIFSSLPTKVDISSAEPDTDAIEPVYPGCDYKIVAALMMEPRDEDSLEIRHGEFSN    |
| 18 | KJ433990       | 100.0% | 97.5%    | LQSSAIFRLDTHHLPETRRPLHFDIFSSLPTKVDISSVEPTDTAIEPVYPGCDYKIVAALMMEPRDEDSLEIRHGEFSN    |
| 19 | AB624361.1     | 100.0% | 97.3%    | LQSSAIFRLDTHHLPETRRPLHFDIFSSLPTKVDISSAEPDTDSIEPVYPGCDYKIVAALMMEPRDEDSLEIRHGEFSN    |
|    | consensus/100% |        |          | LQSSAIFRLDTHHLPETRRPLHFDIFSSLPTKSDISSSESTDTAIEPVYPGCDYKIVAALMM-PRSEDSLEIRHGEFSN    |
|    | consensus/90%  |        |          | LQSSAIFRLDTHHLPETRRPLHFDIFSSLPTKSDISSSESTDTAIEPVYPGCDYKIVAALMM-PRDEDSLEIRHGEFSN    |
|    | consensus/80%  |        |          | LQSSAIFRLDTHHLPETRRPLHFDIFSSLPTKVDISSSEPTDTAIEPVYPGCDYKIVAALMMEPRDEDSLEIRHGEFSN    |
|    | consensus/70%  |        |          | LQSSAIFRLDTHHLPETRRPLHFDIFSSLPTKVDISSVEPTDTAIEPVYPGCDYKIVAALMMEPRDEDSLEIRHGEFSN    |
|    |                | cov    | pid 1281 | . 3 . . . . :                                                                      |
| 1  | DRR068690      | 100.0% | 100.0%   | QFPWVDLEFYENGAQTLSVIAPKHDSKYDPTLLSASIAKRLRFRPSELFYRLSPSDEVLGTFLLFSSLCRAYKRHPNHKVVF |
| 2  | DRR068691      | 100.0% | 96.8%    | QFPWVDLEFYENGAQTLSVIAPKHDSKNDPTLLSASIAKRLRFRPSELFYRLSPSDEVLGTFLLFSSLCRAYKRHPNHKVVF |
| 3  | DRR006265      | 100.0% | 97.2%    | QFPWVDLEFYENGAQTLSVIAPKHDSKYDPTLLSASIAKRLRFRPSELFYRLSPSDEVLGTFLLFSSLCRAYKRHPNHKVVF |
| 4  | DRR039989      | 99.9%  | 97.1%    | QFPWVDLEFYENGAQTLSVIAPKHDSKYDPTLLSASIAKRLRFRPSELFYRLSPSDEVLGTFLLFSSLCRAYKRHPNHKVVF |
| 5  | DRR079253      | 99.9%  | 97.2%    | QFPWVDLEFYENGAQTLSVIAPKHDSKYDPTLLSASIAKRLRFRPSELFYRLSPSDEVLGTFLLFSSLCRAYKRHPNHKVVF |
| 6  | SRR6324419-24  | 100.0% | 95.4%    | QFPWVDLEFYENGAQTLSVIAPKHDSKNDPTLLSASIAKRLRFRPSELFYRLSPSDEVLGTFLLFSSLCRAYKRHPNHKVVF |
| 7  | SRR11781560-1  | 100.0% | 95.5%    | QFPWVDLEFYENGAQTLSVIAPKHDSKNDPTLLSASIAKRLRFRPSELFYRLSPSDEVLGTFLLFSSLCRAYKRHPNHKVVF |
| 8  | SRR5458683     | 100.0% | 97.2%    | QFPWVDLEFYENGAQTLSVIAPKHDSKYDPTLLSASIAKRLRFRPSELFYRLSPSDEVLGTFLLFSSLCRAYKRHPNHKVVF |
| 9  | DRR023337+40   | 100.0% | 97.1%    | QFPWVDLEFYENGAQTLSVIAPKHDSKYDPTLLSASIAKRLRFRPSELFYRLSPSDEVLGTFLLFSSLCRAYKRHPNHKVVF |
| 10 | SRR1333837-38  | 100.0% | 97.2%    | QFPWVDLEFYENGAQTLSVIAPKHDSKYDPTLLSASIAKRLRFRPSELFYRLSPSDEVLGTFLLFSSLCRAYKRHPNHKVVF |
| 11 | DRR241076      | 100.0% | 98.5%    | QFPWVDLEFYENGAQTLSVIAPKHDSKYDPTLLSASIAKRLRFRPSELFYRLSPSDEVLGTFLLFSSLCRAYKRHPNHKVVF |
| 12 | SRR17258733    | 100.0% | 97.3%    | QFPWVDLEFYENGAQTLSVIAPKHDSKYDPTLLSASIAKRLRFRPSELFYRLSPSDEVLGTFLLFSSLCRAYKRHPNHKVVF |
| 13 | SRR24542361    | 100.0% | 96.1%    | QFPWVDLEFYENGAQTLSVIAPKHDSKYDPTLLSASIAKRLRFRPSELFYRLSPSDEVLGTFLLFSSLCRAYKRHPNHKVVF |
| 14 | SRR17258732    | 100.0% | 95.7%    | QFPWVDLEFYENGAQTLSVIAPKHDSKNDPTLLSASIAKRLRFRPSELFYRLSPSDEVLGTFLLFSSLCRAYKRHPNHKVVF |
| 15 | SRR9685281     | 100.0% | 97.2%    | QFPWVDLEFYENGAQTLSVIAPKHDSKYDPTLLSASIAKRLRFRPSELFYRLSPSDEVLGTFLLFSSLCRAYKRHPNHKVVF |
| 16 | DRR035925      | 100.0% | 99.9%    | QFPWVDLEFYENGAQTLSVIAPKHDSKYDPTLLSASIAKRLRFRPSELFYRLSPSDEVLGTFLLFSSLCRAYKRHPNHKVVF |
| 17 | AB186123.1     | 99.9%  | 97.5%    | QFPWVDLEFYENGAQTLSVIAPKHDSKYDPTLLSASIAKRLRFRPSELFYRLSPSDEVLGTFLLFSSLCRAYKRHPNHKVVF |
| 18 | KJ433990       | 100.0% | 97.5%    | QFPWVDLEFYENGAQTLSVIAPKHDSKYDPTLLSASIAKRLRFRPSELFYRLSPSDEVLGTFLLFSSLCRAYKRHPNHKVVF |
| 19 | AB624361.1     | 100.0% | 97.3%    | QFPWVDLEFYENGAQTLSVIAPKHDSKYDPTLLSASIAKRLRFRPSELFYRLSPSDEVLGTFLLFSSLCRAYKRHPNHKVVF |
|    | consensus/100% |        |          | QFPWVDLEFYENGAQTLSVIAPKHDSKNDPTLLSASIAKRLRFRPSELFYRLSPSDEVLGTFLLFSSLCRAYKRHPNHKVVF |
|    | consensus/90%  |        |          | QFPWVDLEFYENGAQTLSVIAPKHDSKNDPTLLSASIAKRLRFRPSELFYRLSPSDEVLGTFLLFSSLCRAYKRHPNHKVVF |
|    | consensus/80%  |        |          | QFPWVDLEFYENGAQTLSVIAPKHDSKNDPTLLSASIAKRLRFRPSELFYRLSPSDEVLGTFLLFSSLCRAYKRHPNHKVVF |
|    | consensus/70%  |        |          | QFPWVDLEFYENGAQTLSVIAPKHDSKYDPTLLSASIAKRLRFRPSELFYRLSPSDEVLGTFLLFSSLCRAYKRHPNHKVVF |
|    |                | cov    | pid 1361 | . . . 4 . . . . 1440                                                               |
| 1  | DRR068690      | 100.0% | 100.0%   | QPDLFVEICINLNEYSQISNKTQAVIQANANRSDPDWRYTAVRIEAKTQHKINEGSI FGPWKACQTLALMMDAIVLIFGPI |
| 2  | DRR068691      | 100.0% | 96.8%    | QPDLFVEICINLNEYSQISNKTQAVIQANANRSDPDWRYTAVRIEAKTQHKINEGSI FGPWKACQTLALMMDAIVLIFGPI |
| 3  | DRR006265      | 100.0% | 97.2%    | QPDLFVEICINLNEYSQISNKTQAVIQANANRSDPDWRYTAVRIEAKTQHKINEGSI FGPWKACQTLALMMDAIVLIFGPI |
| 4  | DRR039989      | 99.9%  | 97.1%    | QPDLFVEICINLNEYSQISNKTQAVIQANANRSDPDWRYTAVRIEAKTQHKINEGSI FGPWKACQTLALMMDAIVLIFGPI |
| 5  | DRR079253      | 99.9%  | 97.2%    | QPDLFVEICINLNEYSQISNKTQAVIQANANRSDPDWRYTAVRIEAKTQHKINEGSI FGPWKACQTLALMMDAIVLIFGPI |
| 6  | SRR6324419-24  | 100.0% | 95.4%    | QPDLFVEICINLNEYSQISNKTQAVIQANANRSDPDWRYTAVRIEAKTQHKINEGSI FGPWKACQTLALMMDAIVLIFGPI |
| 7  | SRR11781560-1  | 100.0% | 95.5%    | QPDLFVEICINLNEYSQISNKTQAVIQANANRSDPDWRYTAVRIEAKTQHKINEGSI FGPWKACQTLALMMDAIVLIFGPI |
| 8  | SRR5458683     | 100.0% | 97.2%    | QPDLFVEICINLNEYSQISNKTQAVIQANANRSDPDWRYTAVRIEAKTQHKINEGSI FGPWKACQTLALMMDAIVLIFGPI |
| 9  | DRR023337+40   | 100.0% | 97.1%    | QPDLFVEICINLNEYSQISNKTQAVIQANANRSDPDWRYTAVRIEAKTQHKINEGSI FGPWKACQTLALMMDAIVLIFGPI |
| 10 | SRR1333837-38  | 100.0% | 97.2%    | QPDLFVEICINLNEYSQISNKTQAVIQANANRSDPDWRYTAVRIEAKTQHKINEGSI FGPWKACQTLALMMDAIVLIFGPI |

|    |                |        |        |         |          |         |           |          |          |          |        |          |        |         |
|----|----------------|--------|--------|---------|----------|---------|-----------|----------|----------|----------|--------|----------|--------|---------|
| 11 | DRR241076      | 100.0% | 98.5%  | QPDLFVE | CINLNEYS | QISNKTQ | AVIQANANR | SDPDWRYT | AVRIFAKT | QHKINEGS | IFGPWK | ACQTLALM | HDAIVL | IFGPI   |
| 12 | SRR17258733    | 100.0% | 97.3%  | QPDLFVE | CINLNEYS | QISNKTQ | AVIQANANR | SDPDWRYT | AVRIFSKT | QHKINEGS | IFGPWK | ACQTLALM | HDAIVL | IFGPI   |
| 13 | SRR24542361    | 100.0% | 96.1%  | QPDLFVE | CINLNEYS | QISNKTQ | AVIQANANR | SDPDWRYT | AVRIFSKT | QHKINEGS | IFGPWK | ACQTLALM | HDAIVL | IFGPI   |
| 14 | SRR17258732    | 100.0% | 95.7%  | QPDLFVE | CINLNEYS | QISNKTQ | AVIQANANR | SDPDWRYT | AVRIFSKT | QHKINEGS | IFGPWK | ACQTLALM | HDAIVL | IFGPI   |
| 15 | SRR9685281     | 100.0% | 97.2%  | QPDLFVE | CINLNEYS | QISNKTQ | AVIQANANR | SDPDWRYT | AVRIFSKT | QHKINEGS | IFGPWK | ACQTLALM | HDAIVL | IFGPI   |
| 16 | DRR035925      | 100.0% | 99.9%  | QPDLFVE | CINLNEYS | QISNKTQ | AVIQANANR | SDPDWRYT | AVRIFAKT | QHKINEGS | IFGPWK | ACQTLALM | HDAIVL | IFGPI   |
| 17 | AB186123.1     | 99.9%  | 97.5%  | QPDLFVE | CINLNEYS | QISNKTQ | AVIQANANR | SDPDWRYT | AVRIFSKT | QHKINEGS | IFGPWK | ACQTLALM | HDAIVL | IFGPI   |
| 18 | KJ433990       | 100.0% | 97.5%  | QPDLFVE | CINLNEYS | QISNKTQ | AVIQANANR | SDPDWRYT | AVRIFSKT | QHKINEGS | IFGPWK | ACQTLALM | HDAIVL | IFGPI   |
| 19 | AB624361.1     | 100.0% | 97.3%  | QPDLFVE | CINLNEYS | QISNKTQ | AVIQANANR | SDPDWRYT | AVRIFAKT | QHKINEGS | IFGPWK | ACQTLALM | HDAIVL | IFGPI   |
|    | consensus/100% |        |        | QPDLFVE | CINLNEYS | QISNKTQ | AVIQANANR | SDPDWRYT | AVRIFUKT | QHKINEGS | IFGPWK | ACQTLALM | HDSIVL | IFGPI   |
|    | consensus/90%  |        |        | QPDLFVE | CINLNEYS | QISNKTQ | AVIQANANR | SDPDWRYT | AVRIFUKT | QHKINEGS | IFGPWK | ACQTLALM | HDAIVL | IFGPI   |
|    | consensus/80%  |        |        | QPDLFVE | CINLNEYS | QISNKTQ | AVIQANANR | SDPDWRYT | AVRIFUKT | QHKINEGS | IFGPWK | ACQTLALM | HDAIVL | IFGPI   |
|    | consensus/70%  |        |        | QPDLFVE | CINLNEYS | QISNKTQ | AVIQANANR | SDPDWRYT | AVRIFSKT | QHKINEGS | IFGPWK | ACQTLALM | HDAIVL | IFGPI   |
|    |                | cov    | pid    | 1441    | :        | .       | .         | .        | .        | .        | 5      | .        | .      | 1520    |
| 1  | DRR068690      | 100.0% | 100.0% | KKYQR   | VFDSKDR  | PPNLFV  | YGGQTPYD  | LSRFAS   | SHLKPLQ  | IHVCNDY  | SAFDQ  | SOHCE    | AVVLER | KKMERLS |
| 2  | DRR068691      | 100.0% | 96.8%  | KKYQR   | VFDSKDR  | PPNLFV  | YGGQTPYD  | LSRFAS   | SHLKPLQ  | IHVCNDY  | SAFDQ  | SOHCE    | AVVLER | KKMERLS |
| 3  | DRR006265      | 100.0% | 97.2%  | KKYQR   | VFDSKDR  | PPNLFV  | YGGQTPYD  | LSRFAS   | SHLKPLQ  | IHVCNDY  | SAFDQ  | SOHCE    | AVVLER | KKMERLS |
| 4  | DRR039989      | 99.9%  | 97.1%  | KKYQR   | VFDSKDR  | PPNLFV  | YGGQTPYD  | LSRFAS   | SHLKPLQ  | IHVCNDY  | SAFDQ  | SOHCE    | AVVLER | KKMERLS |
| 5  | DRR079253      | 99.9%  | 97.2%  | KKYQR   | VFDSKDR  | PPNLFV  | YGGQTPYD  | LSRFAS   | SHLKPLQ  | IHVCNDY  | SAFDQ  | SOHCE    | AVVLER | KKMERLS |
| 6  | SRR6324419-24  | 100.0% | 95.4%  | KKYQR   | VFDSKDR  | PPNLFV  | YGGQTPYD  | LSRFAS   | SHLKPLQ  | IHVCNDY  | SAFDQ  | SOHCE    | AVVLER | KKMERLS |
| 7  | SRR11781560-1  | 100.0% | 95.5%  | KKYQR   | VFDSKDR  | PPNLFV  | YGGQTPYD  | LSRFAS   | SHLKPLQ  | IHVCNDY  | SAFDQ  | SOHCE    | AVVLER | KKMERLS |
| 8  | SRR5458683     | 100.0% | 97.2%  | KKYQR   | VFDSKDR  | PPNLFV  | YGGQTPYD  | LSRFAS   | SHLKPLQ  | IHVCNDY  | SAFDQ  | SOHCE    | AVVLER | KKMERLS |
| 9  | DRR023337+40   | 100.0% | 97.1%  | KKYQR   | VFDSKDR  | PPNLFV  | YGGQTPYD  | LSRFAS   | SHLKPLQ  | IHVCNDY  | SAFDQ  | SOHCE    | AVVLER | KKMERLS |
| 10 | SRR1333837-38  | 100.0% | 97.2%  | KKYQR   | VFDSKDR  | PPNLFV  | YGGQTPYD  | LSRFAS   | SHLKPLQ  | IHVCNDY  | SAFDQ  | SOHCE    | AVVLER | KKMERLS |
| 11 | DRR241076      | 100.0% | 98.5%  | KKYQR   | VFDSKDR  | PPNLFV  | YGGQTPYD  | LSRFAS   | SHLKPLQ  | IHVCNDY  | SAFDQ  | SOHCE    | AVVLER | KKMERLS |
| 12 | SRR17258733    | 100.0% | 97.3%  | KKYQR   | VFDSKDR  | PPNLFV  | YGGQTPYD  | LSRFAS   | SHLKPLQ  | IHVCNDY  | SAFDQ  | SOHCE    | AVVLER | KKMERLS |
| 13 | SRR24542361    | 100.0% | 96.1%  | KKYQR   | VFDSKDR  | PPNLFV  | YGGQTPYD  | LSRFAS   | SHLKPLQ  | IHVCNDY  | SAFDQ  | SOHCE    | AVVLER | KKMERLS |
| 14 | SRR17258732    | 100.0% | 95.7%  | KKYQR   | VFDSKDR  | PPNLFV  | YGGQTPYD  | LSRFAS   | SHLKPLQ  | IHVCNDY  | SAFDQ  | SOHCE    | AVVLER | KKMERLS |
| 15 | SRR9685281     | 100.0% | 97.2%  | KKYQR   | VFDSKDR  | PPNLFV  | YGGQTPYD  | LSRFAS   | SHLKPLQ  | IHVCNDY  | SAFDQ  | SOHCE    | AVVLER | KKMERLS |
| 16 | DRR035925      | 100.0% | 99.9%  | KKYQR   | VFDSKDR  | PPNLFV  | YGGQTPYD  | LSRFAS   | SHLKPLQ  | IHVCNDY  | SAFDQ  | SOHCE    | AVVLER | KKMERLS |
| 17 | AB186123.1     | 99.9%  | 97.5%  | KKYQR   | VFDSKDR  | PPNLFV  | YGGQTPYD  | LSRFAS   | SHLKPLQ  | IHVCNDY  | SAFDQ  | SOHCE    | AVVLER | KKMERLS |
| 18 | KJ433990       | 100.0% | 97.5%  | KKYQR   | VFDSKDR  | PPNLFV  | YGGQTPYD  | LSRFAS   | SHLKPLQ  | IHVCNDY  | SAFDQ  | SOHCE    | AVVLER | KKMERLS |
| 19 | AB624361.1     | 100.0% | 97.3%  | KKYQR   | VFDSKDR  | PPNLFV  | YGGQTPYD  | LSRFAS   | SHLKPLQ  | IHVCNDY  | SAFDQ  | SOHCE    | AVVLER | KKMERLS |
|    | consensus/100% |        |        | KKYQR   | VFDSKDR  | PPNLFV  | YGGQTPYD  | LSRFAS   | SHLKPLQ  | IHVCNDY  | SAFDQ  | SOHCE    | AVVLER | KKMERLS |
|    | consensus/90%  |        |        | KKYQR   | VFDSKDR  | PPNLFV  | YGGQTPYD  | LSRFAS   | SHLKPLQ  | IHVCNDY  | SAFDQ  | SOHCE    | AVVLER | KKMERLS |
|    | consensus/80%  |        |        | KKYQR   | VFDSKDR  | PPNLFV  | YGGQTPYD  | LSRFAS   | SHLKPLQ  | IHVCNDY  | SAFDQ  | SOHCE    | AVVLER | KKMERLS |
|    | consensus/70%  |        |        | KKYQR   | VFDSKDR  | PPNLFV  | YGGQTPYD  | LSRFAS   | SHLKPLQ  | IHVCNDY  | SAFDQ  | SOHCE    | AVVLER | KKMERLS |
|    |                | cov    | pid    | 1521    | :        | .       | .         | .        | .        | .        | .      | .        | .      | 1600    |
| 1  | DRR068690      | 100.0% | 100.0% | IKTNI   | TSQFGL   | PTCMRL  | TGEPG     | TYDDNT   | DYNI     | AVIYSEY  | DITTQ  | TFEV     | SGD    | SLVSPPP |
| 2  | DRR068691      | 100.0% | 96.8%  | IKTNI   | TSQFGL   | PTCMRL  | TGEPG     | TYDDNT   | DYNI     | AVIYSEY  | DITTQ  | TFEV     | SGD    | SLVSPPP |
| 3  | DRR006265      | 100.0% | 97.2%  | IKTNI   | TSQFGL   | PTCMRL  | TGEPG     | TYDDNT   | DYNI     | AVIYSEY  | DITTQ  | TFEV     | SGD    | SLVSPPP |
| 4  | DRR039989      | 99.9%  | 97.1%  | IKTNI   | TSQFGL   | PTCMRL  | TGEPG     | TYDDNT   | DYNI     | AVIYSEY  | DITTQ  | TFEV     | SGD    | SLVSPPP |



|    |                | cov    | pid    | 1681                                                                       | . | 7 | . | . | . | : | ] 1760 |
|----|----------------|--------|--------|----------------------------------------------------------------------------|---|---|---|---|---|---|--------|
| 1  | DRR068690      | 100.0% | 100.0% | SKEQKLALKIGEVPEHLCQTMLSLGFSWLSRPLYALLDRTARLRLLARTRFAPLFSDFSVEGVLIQIDF----- |   |   |   |   |   |   |        |
| 2  | DRR068691      | 100.0% | 96.8%  | SKEQKLALKIGEVPEHLCQTMLSLGFSWLSRPLYALLDRTARLRLLARTRFAPLFSDFSVEGVLIQIDF----- |   |   |   |   |   |   |        |
| 3  | DRR006265      | 100.0% | 97.2%  | SKEQKLALKIGEVPEHLCQTMLSLGFSWLSRPLYALLDRTARLRLLARTRFAPLFSDFSVEGVLIQIDF----- |   |   |   |   |   |   |        |
| 4  | DRR039989      | 99.9%  | 97.1%  | SKEQKLALKIGEVPEHLCQTMLSLGFSWLSRPLYALLDRTARLRLLARTRFAPLFSDFSVEGVLIQIDF----- |   |   |   |   |   |   |        |
| 5  | DRR079253      | 99.9%  | 97.2%  | SKEQKLALKIGEVPEHLCQTMLSLGFSWLSRPLYALLDRTARLRLLARTRFAPLFSDFSVEGVLIQIDF----- |   |   |   |   |   |   |        |
| 6  | SRR6324419-24  | 100.0% | 95.4%  | SKEQKLALKIGEVPEHLCQTMLSLGFSWLSRPLYALLDRTARLRLLARTRFAPLFSDFSVEGVLIQIDF----- |   |   |   |   |   |   |        |
| 7  | SRR11781560-1  | 100.0% | 95.5%  | SKEQKLALKIGEVPEHLCQTMLSLGFSWLSRPLYALLDRTARLRLLARTRFAPLFSDFSVEGVLIQIDF----- |   |   |   |   |   |   |        |
| 8  | SRR5458683     | 100.0% | 97.2%  | SKEQKLALKIGEVPEHLCQTMLSLGFSWLSRPLYALLDRTARLRLLARTRFAPLFSDFSVEGVLIQIDF----- |   |   |   |   |   |   |        |
| 9  | DRR023337+40   | 100.0% | 97.1%  | SKEQKLALKIGEVPEHLCQTMLSLGFSWLSRPLYALLDRTARLRLLARTRFAPLFSDFSVEGVLIQIDF----- |   |   |   |   |   |   |        |
| 10 | SRR1333837-38  | 100.0% | 97.2%  | SKEQKLALKIGEVPEHLCQTMLSLGFSWLSRPLYALLDRTARLRLLARTRFAPLFSDFSVEGVLIQIDF----- |   |   |   |   |   |   |        |
| 11 | DRR241076      | 100.0% | 98.5%  | SKEQKLALKIGEVPEHLCQTMLSLGFSWLSRPLYALLDRTARLRLLARTRFAPLFSDFSVEGVLIQIDF----- |   |   |   |   |   |   |        |
| 12 | SRR17258733    | 100.0% | 97.3%  | SKEQKLALKIGEVPEHLCQTMLSLGFSWLSRPLYALLDRTARLRLLARTRFAPLFSDFSVEGVLIQIDF----- |   |   |   |   |   |   |        |
| 13 | SRR24542361    | 100.0% | 96.1%  | SKEQKLALKIGEVPEHLCQTMLSLGFSWLSRPLYALLDRTARLRLLARTRFAPLFSDFSVEGVLIQIDF----- |   |   |   |   |   |   |        |
| 14 | SRR17258732    | 100.0% | 95.7%  | SKEQKLALKIGEVPEHLCQTMLSLGFSWLSRPLYALLDRTARLRLLARTRFAPLFSDFSVEGVLIQIDF----- |   |   |   |   |   |   |        |
| 15 | SRR9685281     | 100.0% | 97.2%  | SKEQKLALKIGEVPEHLCQTMLSLGFSWLSRPLYALLDRTARLRLLARTRFAPLFSDFSVEGVLIQIDF----- |   |   |   |   |   |   |        |
| 16 | DRR035925      | 100.0% | 99.9%  | SKEQKLALKIGEVPEHLCQTMLSLGFSWLSRPLYALLDRTARLRLLARTRFAPLFSDFSVEGVLIQIDF----- |   |   |   |   |   |   |        |
| 17 | AB186123.1     | 99.9%  | 97.5%  | SKEQKLALKIGEVPEHLCQTMLSLGFSWLSRPLYALLDRTARLRLLARTRFAPLFSDFSVEGVLIQIDF----- |   |   |   |   |   |   |        |
| 18 | KJ433990       | 100.0% | 97.5%  | SKEQKLALKIGEVPEHLCQTMLSLGFSWLSRPLYALLDRTARLRLLARTRFAPLFSDFSVEGVLIQIDF----- |   |   |   |   |   |   |        |
| 19 | AB624361.1     | 100.0% | 97.3%  | SKEQKLALKIGEVPEHLCQTMLSLGFSWLSRPLYALLDRTARLRLLARTRFAPLFSDFSVEGVLIQIDF----- |   |   |   |   |   |   |        |
|    | consensus/100% |        |        | SKEQKLALKIGEVPEHLCQTMLSLGFSWLSRPLYALLDRTARLRLLARTRFAPLFSDFSVEGVLIQIDF----- |   |   |   |   |   |   |        |
|    | consensus/90%  |        |        | SKEQKLALKIGEVPEHLCQTMLSLGFSWLSRPLYALLDRTARLRLLARTRFAPLFSDFSVEGVLIQIDF----- |   |   |   |   |   |   |        |
|    | consensus/80%  |        |        | SKEQKLALKIGEVPEHLCQTMLSLGFSWLSRPLYALLDRTARLRLLARTRFAPLFSDFSVEGVLIQIDF----- |   |   |   |   |   |   |        |
|    | consensus/70%  |        |        | SKEQKLALKIGEVPEHLCQTMLSLGFSWLSRPLYALLDRTARLRLLARTRFAPLFSDFSVEGVLIQIDF----- |   |   |   |   |   |   |        |
